# Supplementary material
Source: PubMed Central journal article supplement (PMC10638052)
Supplement: mmc1.pdf [file mmc1.pdf]

YMTHE, Volume 31

## **Supplemental Information**

***In vivo* CRISPR gene editing**

**in patients with herpetic stromal keratitis**

**Anji Wei, Di Yin, Zimeng Zhai, Sikai Ling, Huangying Le, Lijia Tian, Jianjiang Xu, Soren R. Paludan, Yujia Cai, and Jiaxu Hong**

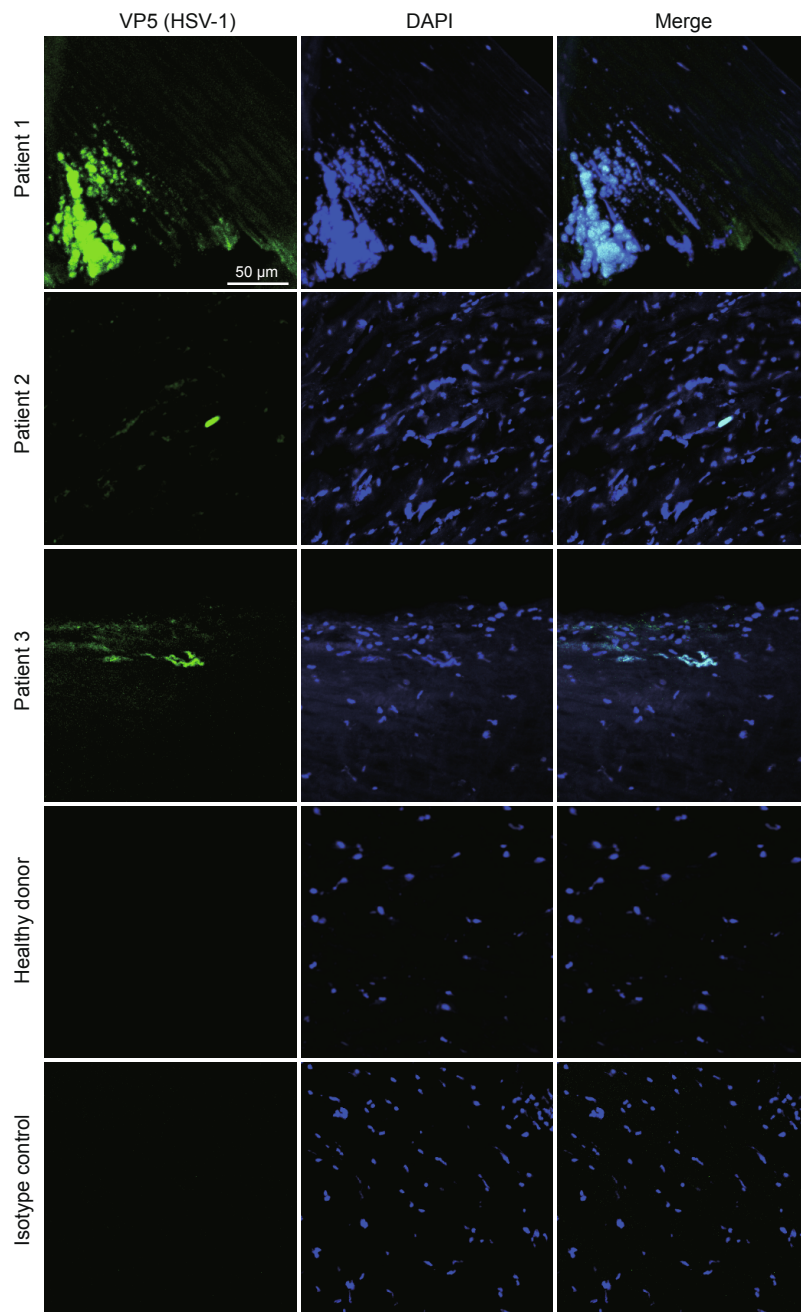

**Fig. S1. Fluorescence microscopy analysis of HSV-1 in the removed corneal buttons.** HSV-1 capsid protein VP5 was presented in green while DAPI was in blue. Their perfect overlap after merging suggests the presence of HSV-1 in the patient corneal tissue before CRISPR treatment.

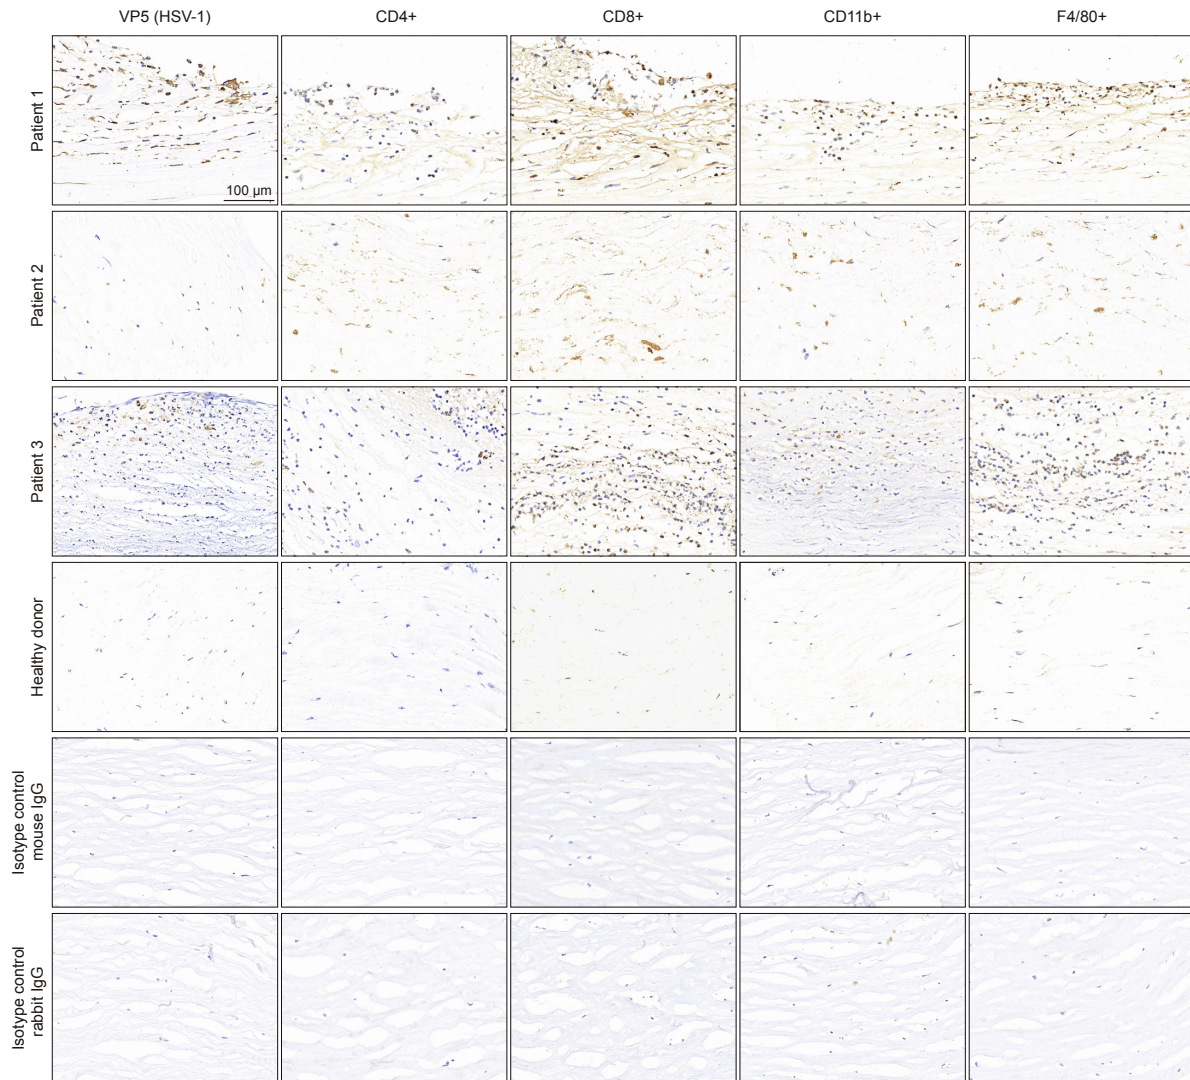

**Fig. S2. Immunohistochemistry analysis of immune cells in the corneal button.** The removed corneal buttons from the patients were stained for T cells (CD4+ and CD8+), myeloid-derived cells (CD11b+) and macrophages (F4/80+). Immunohistochemistry confirmed excess infiltration of inflammatory cells compared to the healthy cornea.

A

|                |               |            |            |            |             |             |     |  |
|----------------|---------------|------------|------------|------------|-------------|-------------|-----|--|
|                |               |            | 20         |            | 40          |             | 60  |  |
| HSV-1 KOS UL23 | MASYPCHQHA    | SAFDQAARSR | GHSNRRTALR | PRRQQEATEV | RLEQKMP TLL | RVYIDGPHGM  | 60  |  |
| HSV-1 17+ UL23 | MASYPCHQHA    | SAFDQAARSR | GHNNRRTALR | PRRQQKATEV | RLEQKMP TLL | RVYIDGPHGM  | 60  |  |
| Patient 1 UL23 | - - - YPCHQHA | SAFDQAARSR | GHSNRRTALR | PRRQQEATEV | RLEQKMP TLL | RVYIDGPHGM  | 57  |  |
| Patient 2 UL23 | - - - YPCHQHA | SAFDQAARSR | GHSNRRTALR | PRRQQEATEV | RLEQKMP TLL | RVYIDGPHGM  | 57  |  |
| Patient 3 UL23 | - - - YPCHQHA | SAFDQAARSR | GHSNRRTALR | PRRQQEATEV | RLEQKMP TLL | RVYIDGPHGM  | 57  |  |
|                |               |            | 80         |            | 100         |             | 120 |  |
| HSV-1 KOS UL23 | GKTTTTQLLV    | ALGSRDDIVY | VPEPMTYWQV | LGASETIANI | YTTQHRLDQG  | EISAGDAAVV  | 120 |  |
| HSV-1 17+ UL23 | GKTTTTQLLV    | ALGSRDDIVY | VPEPMTYWRV | LGASETIANI | YTTQHRLDQG  | EISAGDAAVV  | 120 |  |
| Patient 1 UL23 | GKTTTTQLLV    | ALGSRDDIVY | VPEPMTYWQV | LGASETIANI | YTTQHRLDQG  | EISAGDAAVV  | 117 |  |
| Patient 2 UL23 | GKTTTTQLLV    | ALGSRDDIVY | VPEPMTYWQV | LGASETIANI | YTTQHRLDQG  | EISAGDAAVV  | 117 |  |
| Patient 3 UL23 | GKTTTTQLLV    | ALGSRDDIVY | VPEPMTYWQV | LGASETIANI | YTTQHRLDQG  | EISAGDAAVV  | 117 |  |
|                |               |            | 140        |            | 160         |             | 180 |  |
| HSV-1 KOS UL23 | MTSAQITMGM    | PYAVTDAVLA | PHIGGEAGSS | HAPPPALTLI | FDRHP IAALL | CYPAARYLMG  | 180 |  |
| HSV-1 17+ UL23 | MTSAQITMGM    | PYAVTDAVLA | PHIGGEAGSS | HAPPPALTLI | FDRHP IAALL | CYPAARYLMG  | 180 |  |
| Patient 1 UL23 | MTSAQITMGM    | PYAVTDAVLA | PHIGGEAGSS | HAPPPALTLI | FDRHP IAALL | CYPAARYLMG  | 177 |  |
| Patient 2 UL23 | MTSAQITMGM    | PYAVTDAVLA | PHIGGEAGSS | HAPPPALTLI | FDRHP IAALL | CYPAARYLMG  | 177 |  |
| Patient 3 UL23 | MTSAQITMGM    | PYAVTDAVLA | PHIGGEAGSS | HAPPPALTLI | FDRHP IAALL | CYPAARYLMG  | 177 |  |
|                |               |            | 200        |            | 220         |             | 240 |  |
| HSV-1 KOS UL23 | SMT PQAVLAF   | VALIPPTLPG | TNIVLGALPE | DRHIDRLAKR | QRPGERDLA   | MLAAIRRVYV  | 240 |  |
| HSV-1 17+ UL23 | SMT PQAVLAF   | VALIPPTLPG | TNIVLGALPE | DRHIDRLAKR | QRPGERDLA   | MLAAIRRVYV  | 240 |  |
| Patient 1 UL23 | SMT PQAVLAF   | VALIPPTLPG | TNIVLGALPE | DRHIDRLAKR | QRPGERDLA   | MLAAIRRVYV  | 237 |  |
| Patient 2 UL23 | SMT PQAVLAF   | VALIPPTLPG | TNIVLGALPE | DRHIDRLAKR | QRPGERDLA   | MLAAIRRVYV  | 237 |  |
| Patient 3 UL23 | SMT PQAVLAF   | VALIPPTLPG | TNIVLGALPE | DRHIDRLAKR | QRPGERDLA   | MLAAIRRVYV  | 237 |  |
|                |               |            | 260        |            | 280         |             | 300 |  |
| HSV-1 KOS UL23 | LLANTVRYLQ    | GGGSWREDWG | QLSGTAVPPQ | GAEPQSNAGP | RPHIGDTLFT  | LFRAPPELLAP | 300 |  |
| HSV-1 17+ UL23 | LLANTVRYLQ    | GGGSWREDWG | QLSGAAVPPQ | GAEPQSNAGP | RPHIGDTLFT  | LFRAPPELLAP | 300 |  |
| Patient 1 UL23 | LLANTVRYLQ    | GGGSWREDWG | QLSGTAVPPQ | GAEPQSNAGP | RPHIGDTLFT  | LFRAPPELLAP | 297 |  |
| Patient 2 UL23 | LLANTVRYLQ    | GGGSWREDWG | QLSGTAVPPQ | GAEPQSNAGP | RPHIGDTLFT  | LFRAPPELLAP | 297 |  |
| Patient 3 UL23 | LLANTVRYLQ    | GGGSWREDWG | QLSGTAVPPQ | GAEPQSNAGP | RPHIGDTLFT  | LFRAPPELLAP | 297 |  |
|                |               |            | 320        |            | 340         |             | 360 |  |
| HSV-1 KOS UL23 | NGDLYNVFAW    | ALDVLAKRLR | PMHVFILDYD | QSPAGCRDAL | LQLTSGMVQT  | HVTTPGS IPT | 360 |  |
| HSV-1 17+ UL23 | NGDLYNVFAW    | ALDVLAKRLR | PMHVFILDYD | QSPAGCRDAL | LQLTSGMVQT  | HVTTPGS IPT | 360 |  |
| Patient 1 UL23 | NGDLYNVFAW    | ALDVLAKRLR | PMHVFILDYD | QSPAGCRDAL | LQLTSGMVQT  | HVTTPGS IPT | 357 |  |
| Patient 2 UL23 | NGDLYNVFAW    | ALDVLAKRLR | PMHVFILDYD | QSPAGCRDAL | LQLTSGMVQT  | HVTTPGS IPT | 357 |  |
| Patient 3 UL23 | NGDLYNVFAW    | ALDVLAKRLR | PMHVFILDYD | QSPAGCRDAL | LQLTSGMVQT  | HVTTPGS IPT | 357 |  |
| HSV-1 KOS UL23 | ICDLARTFAR    | EMGEAN     |            |            |             |             | 377 |  |
| HSV-1 17+ UL23 | ICDLARTFAR    | EMGEAN     |            |            |             |             | 377 |  |
| Patient 1 UL23 | ICDLARTFAR    | EMGEAN     |            |            |             |             | 374 |  |
| Patient 2 UL23 | ICDLARTFAR    | EMGEAN     |            |            |             |             | 374 |  |
| Patient 3 UL23 | ICDLARTFAR    | EMGEAN     |            |            |             |             | 374 |  |

**B**

|                |            |             |            |            |              |             |     |
|----------------|------------|-------------|------------|------------|--------------|-------------|-----|
|                |            |             | 20         |            | 40           |             | 60  |
| HSV-1 KOS UL30 | MFSGGGGPLS | PGGKSAARAA  | SGFFAPAGPR | GAGRGGPPCL | RQNFYNPYLA   | PVGTQQKPTG  | 60  |
| HSV-1 17+ UL30 | MFSGGGGPLS | PGGKSAARAA  | SGFFAPAGPR | GASRGPPPC  | RQNFYNPYLA   | PVGTQQKPTG  | 60  |
| Patient 1 UL30 | -----      | -----RAA    | SGFFAPAGPR | GASRGPPPC  | RQNFYNPYLA   | PVGTQQKPTG  | 43  |
| Patient 2 UL30 | -----      | -----RAA    | SGFFAPAGPR | GAGRGGPPCL | RQNFYNPYLA   | PVGTQQKPTG  | 43  |
| Patient 3 UL30 | -----      | -----RAA    | SGFFAPAGPR | GAGRGGPPCL | RQNFYNPYLA   | PVGTQQKPTG  | 43  |
|                |            |             | 80         |            | 100          |             | 120 |
| HSV-1 KOS UL30 | PTQRHTYYSE | CDEFRF IAPR | VLDEDAPPEK | RAGVHDGHLK | RAPKVYCGGD   | ERDVLRVGSG  | 120 |
| HSV-1 17+ UL30 | PTQRHTYYSE | CDEFRF IAPR | VLDEDAPPEK | RAGVHDGHLK | RAPKVYCGGD   | ERDVLRVGSG  | 120 |
| Patient 1 UL30 | PTQRHTYYSE | CDEFRF IAPR | VLDEDAPPEK | RAGVHDGHLK | RAPKVYCGGD   | ERDVLRVGSG  | 103 |
| Patient 2 UL30 | PTQRHTYYSE | CDEFRF IAPR | VLDEDAPPEK | RAGVHDGHLK | RAPKVYCGGD   | ERDVLRVGSG  | 103 |
| Patient 3 UL30 | PTQRHTYYSE | CDEFRF IAPR | VLDEDAPPEK | RAGVHDGHLK | RAPKVYCGGD   | ERDVLRVGSG  | 103 |
|                |            |             | 140        |            | 160          |             | 180 |
| HSV-1 KOS UL30 | GFWPRRSRLW | GGVDHAPAGF  | NPTVTVFHYV | DILENVEHAY | GMRAAQFHAR   | FMDAITPTGT  | 180 |
| HSV-1 17+ UL30 | GFWPRRSRLW | GGVDHAPAGF  | NPTVTVFHYV | DILENVEHAY | GMRAAQFHAR   | FMDAITPTGT  | 180 |
| Patient 1 UL30 | GFWPRRSRLW | GGVDHAPAGF  | NPTVTVFHYV | DILENVEHAY | GMRAAQFHAR   | FMDAITPTGT  | 163 |
| Patient 2 UL30 | GFWPRRSRLW | GGVDHAPAGF  | NPTVTVFHYV | DILENVEHAY | GMRAAQFHAR   | FMDAITPTGT  | 163 |
| Patient 3 UL30 | GFWPRRSRLW | GGVDHAPAGF  | NPTVTVFHYV | DILENVEHAY | GMRAAQFHAR   | FMDAITPTGT  | 163 |
|                |            |             | 200        |            | 220          |             | 240 |
| HSV-1 KOS UL30 | VITLLGLTPE | GHRVAVHVG   | TRQFYFVNKE | EVDRLQCRA  | PRDLCERMAA   | ALRESPGASF  | 240 |
| HSV-1 17+ UL30 | VITLLGLTPE | GHRVAVHVG   | TRQFYFVNKE | EVDRLQCRA  | PRDLCERMAA   | ALRESPGASF  | 240 |
| Patient 1 UL30 | VITLLGLTPE | GHRVAVHVG   | TRQFYFVNKE | EVDRLQCRA  | PRDLCERMAA   | ALRESPGASF  | 223 |
| Patient 2 UL30 | VITLLGLTPE | GHRVAVHVG   | TRQFYFVNKE | EVDRLQCRA  | PRDLCERMAA   | ALRESPGASF  | 223 |
| Patient 3 UL30 | VITLLGLTPE | GHRVAVHVG   | TRQFYFVNKE | EVDRLQCRA  | PRDLCERMAA   | ALRESPGASF  | 223 |
|                |            |             | 260        |            | 280          |             | 300 |
| HSV-1 KOS UL30 | RGISADHFEA | EVVERTDVY   | YETRPALFYR | VYVRSGRVLS | YLCDNFCPAI   | KKYEGGV DAT | 300 |
| HSV-1 17+ UL30 | RGISADHFEA | EVVERTDVY   | YETRPALFYR | VYVRSGRVLS | YLCDNFCPAI   | KKYEGGV DAT | 300 |
| Patient 1 UL30 | RGISADHFEA | EVVERTDVY   | YETRPALFYR | VYVRSGRVLS | YLCDNFCPAI   | KKYEGGV DAT | 283 |
| Patient 2 UL30 | RGISADHFEA | EVVERTDVY   | YETRPALFYR | VYVRSGRVLS | YLCDNFCPAI   | KKYEGGV DAT | 283 |
| Patient 3 UL30 | RGISADHFEA | EVVERTDVY   | YETRPALFYR | VYVRSGRVLS | YLCDNFCPAI   | KKYEGGV DAT | 283 |
|                |            |             | 320        |            | 340          |             | 360 |
| HSV-1 KOS UL30 | TRFILDNPGF | VTFGWYRLKP  | GRNNTLAQPR | APMAFGTSSD | VEFNCTADNL   | AIEGGMSDLP  | 360 |
| HSV-1 17+ UL30 | TRFILDNPGF | VTFGWYRLKP  | GRNNTLAQPR | APMAFGTSSD | VEFNCTADNL   | AIEGGMSDLP  | 360 |
| Patient 1 UL30 | TRFILDNPGF | VTFGWYRLKP  | GRNNTLAQPR | APMAFGTSSD | VEFNCTADNL   | AIEGGMSDLP  | 343 |
| Patient 2 UL30 | TRFILDNPGF | VTFGWYRLKP  | GRNNTLAQPR | APMAFGTSSD | VEFNCTADNL   | AIEGGMSDLP  | 343 |
| Patient 3 UL30 | TRFILDNPGF | VTFGWYRLKP  | GRNNTLAQPR | APMAFGTSSD | VEFNCTADNL   | AIEGGMSDLP  | 343 |
|                |            |             | 380        |            | 400          |             | 420 |
| HSV-1 KOS UL30 | AYKLMCFDIE | CKAGGEDELA  | FPVAGHPEDL | VIQISCLLYD | LSTTALEHVL   | LFSLGS CDLP | 420 |
| HSV-1 17+ UL30 | AYKLMCFDIE | CKAGGEDELA  | FPVAGHPEDL | VIQISCLLYD | LSTTALEHVL   | LFSLGS CDLP | 420 |
| Patient 1 UL30 | AYKLMCFDIE | CKAGGEDELA  | FPVAGHPEDL | VIQISCLLYD | LSTTALEHVL   | LFSLGS CDLP | 403 |
| Patient 2 UL30 | AYKLMCFDIE | CKAGGEDELA  | FPVAGHPEDL | VIQISCLLYD | LSTTALEHVL   | LFSLGS CDLP | 403 |
| Patient 3 UL30 | AYKLMCFDIE | CKAGGEDELA  | FPVAGHPEDL | VIQISCLLYD | LSTTALEHVL   | LFSLGS CDLP | 403 |
|                |            |             | 440        |            | 460          |             | 480 |
| HSV-1 KOS UL30 | ESHLNELAAR | GLPTPVVLEF  | DSEFEMLLAF | MTLVKQYGPE | FVTGYN I INF | DWPFLAKLT   | 480 |
| HSV-1 17+ UL30 | ESHLNELAAR | GLPTPVVLEF  | DSEFEMLLAF | MTLVKQYGPE | FVTGYN I INF | DWPFLAKLT   | 480 |
| Patient 1 UL30 | ESHLNELAAR | GLPTPVVLEF  | DSEFEMLLAF | MTLVKQYGPE | FVTGYN I INF | DWPFLAKLT   | 463 |
| Patient 2 UL30 | ESHLNELAAR | GLPTPVVLEF  | DSEFEMLLAF | MTLVKQYGPE | FVTGYN I INF | DWPFLAKLT   | 463 |
| Patient 3 UL30 | ESHLNELAAR | GLPTPVVLEF  | DSEFEMLLAF | MTLVKQYGPE | FVTGYN I INF | DWPFLAKLT   | 463 |
|                |            |             | 500        |            | 520          |             | 540 |
| HSV-1 KOS UL30 | DIYKVPLDGY | GRMNGRGVFR  | VWDIGQSHFQ | KRSKIKVNGM | VNIDMYGIIT   | DKIKLSSYKL  | 540 |
| HSV-1 17+ UL30 | DIYKVPLDGY | GRMNGRGVFR  | VWDIGQSHFQ | KRSKIKVNGM | VNIDMYGIIT   | DKIKLSSYKL  | 540 |
| Patient 1 UL30 | DIYKVPLDGY | GRMNGRGVFR  | VWDIGQSHFQ | KRSKIKVNGM | VNIDMYGIIT   | DKIKLSSYKL  | 523 |
| Patient 2 UL30 | DIYKVPLDGY | GRMNGRGVFR  | VWDIGQSHFQ | KRSKIKVNGM | VNIDMYGIIT   | DKIKLSSYKL  | 523 |
| Patient 3 UL30 | DIYKVPLDGY | GRMNGRGVFR  | VWDIGQSHFQ | KRSKIKVNGM | VNIDMYGIIT   | DKIKLSSYKL  | 523 |
|                |            |             | 560        |            | 580          |             | 600 |
| HSV-1 KOS UL30 | NAVAEAVLKD | KKKDLSYRDI  | PAYYATGPAQ | RGVIGEYCIQ | DSLLVGQLFF   | KFLPHLELSA  | 600 |
| HSV-1 17+ UL30 | NAVAEAVLKD | KKKDLSYRDI  | PAYYAAGPAQ | RGVIGEYCIQ | DSLLVGQLFF   | KFLPHLELSA  | 600 |
| Patient 1 UL30 | NAVAEAVLKD | KKKDLSYRDI  | PAYYAAGPAQ | RGVIGEYCIQ | DSLLVGQLFF   | KFLPHLELSA  | 583 |
| Patient 2 UL30 | NAVAEAVLKD | KKKDLSYRDI  | PAYYATGPAQ | RGVIGEYCIQ | DSLLVGQLFF   | KFLPHLELSA  | 583 |
| Patient 3 UL30 | NAVAEAVLKD | KKKDLSYRDI  | PAYYATGPAQ | RGVIGEYCIQ | DSLLVGQLFF   | KFLPHLELSA  | 583 |
|                |            |             | 620        |            | 640          |             | 660 |
| HSV-1 KOS UL30 | VARLAGINIT | RTIYDQQQIR  | VFTCLLRLAD | QKGFILPDTQ | GRFRGAGGEA   | PKRPA AARED | 660 |
| HSV-1 17+ UL30 | VARLAGINIT | RTIYDQQQIR  | VFTCLLRLAD | QKGFILPDTQ | GRFRGAGGEA   | PKRPA AARED | 660 |
| Patient 1 UL30 | VARLAGINIT | RTIYDQQQIR  | VFTCLLRLAD | QKGFILPDTQ | GRFRGAGGEA   | PKRPA AARED | 643 |
| Patient 2 UL30 | VARLAGINIT | RTIYDQQQIR  | VFTCLLRLAD | QKGFILPDTQ | GRFRGAGGEA   | PKRPA AARED | 643 |
| Patient 3 UL30 | VARLAGINIT | RTIYDQQQIR  | VFTCLLRLAD | QKGFILPDTQ | GRFRGAGGEA   | PKRPA AARED | 643 |
|                |            |             | 680        |            | 700          |             | 720 |
| HSV-1 KOS UL30 | EERPEEEGED | EDERE EGGGE | REPEGARETA | GRHVGYQGAR | VLDPTSGFHV   | NPVVVDFAS   | 720 |
| HSV-1 17+ UL30 | EERPEEEGED | EDERE EGGGE | REPEGARETA | GRHVGYQGAR | VLDPTSGFHV   | NPVVVDFAS   | 720 |
| Patient 1 UL30 | EERPEEEGED | EDERE EGGGE | REPEGARETA | GRHVGYQGAR | VLDPTSGFHV   | NPVVVDFAS   | 703 |
| Patient 2 UL30 | EERPEEEGED | EDERE EGGGE | REPEGARETA | GRHVGYQGAR | VLDPTSGFHV   | NPVVVDFAS   | 703 |
| Patient 3 UL30 | EERPEEEGED | EDERE EGGGE | REPEGARETA | GRHVGYQGAR | VLDPTSGFHV   | NPVVVDFAS   | 703 |

|                |             |            |            |             |            |            |       |      |  |
|----------------|-------------|------------|------------|-------------|------------|------------|-------|------|--|
|                |             |            | 740        |             |            | 760        |       | 780  |  |
| HSV-1 KOS UL30 | LYPSI IQAHN | LCFSTLSLRA | DAVAHLEAGK | DYLEIEVGGR  | RLFFVKAHVR | ESLLSILLRD |       | 780  |  |
| HSV-1 17+ UL30 | LYPSI IQAHN | LCFSTLSLRA | DAVAHLEAGK | DYLEIEVGGR  | RLFFVKAHVR | ESLLSILLRD |       | 780  |  |
| Patient 1 UL30 | LYPSI IQAHN | LCFSTLSLRA | DAVAHLEAGK | DYLEIEVGGR  | RLFFVKAHVR | ESLLSILLRD |       | 763  |  |
| Patient 2 UL30 | LYPSI IQAHN | LCFSTLSLRA | DAVAHLEAGK | DYLEIEVGGR  | RLFFVKAHVR | ESLLSILLRD |       | 763  |  |
| Patient 3 UL30 | LYPSI IQAHN | LCFSTLSLRA | DAVAHLEAGK | DYLEIEVGGR  | RLFFVKAHVR | ESLLSILLRD |       | 763  |  |
|                |             |            | 800        |             |            | 820        |       | 840  |  |
| HSV-1 KOS UL30 | WLAMRKQIRS  | RIPQSSPEEA | VLLDKQQAAI | KVVCNSVYGF  | TGVQHGLLPC | LHVAATVTTI |       | 840  |  |
| HSV-1 17+ UL30 | WLAMRKQIRS  | RIPQSSPEEA | VLLDKQQAAI | KVVCNSVYGF  | TGVQHGLLPC | LHVAATVTTI |       | 840  |  |
| Patient 1 UL30 | WLAMRKQIRS  | RIPQSSPEEA | VLLDKQQAAI | KVVCNSVYGF  | TGVQHGLLPC | LHVAATVTTI |       | 823  |  |
| Patient 2 UL30 | WLAMRKQIRS  | RIPQSSPEEA | VLLDKQQAAI | KVVCNSVYGF  | TGVQHGLLPC | LHVAATVTTI |       | 823  |  |
| Patient 3 UL30 | WLAMRKQIRS  | RIPQSSPEEA | VLLDKQQAAI | KVVCNSVYGF  | TGVQHGLLPC | LHVAATVTTI |       | 823  |  |
|                |             |            | 860        |             |            | 880        |       | 900  |  |
| HSV-1 KOS UL30 | GREMLLATRE  | YVHARWAAFE | QLLADFPEAA | DMRAPGPYSM  | RIIYGDTSI  | FVLCRGLTAA |       | 900  |  |
| HSV-1 17+ UL30 | GREMLLATRE  | YVHARWAAFE | QLLADFPEAA | DMRAPGPYSM  | RIIYGDTSI  | FVLCRGLTAA |       | 900  |  |
| Patient 1 UL30 | GREMLLATRE  | YVHARWAAFE | QLLADFPEAA | DMRAPGPYSM  | RIIYGDTSI  | FVLCRGLTAA |       | 883  |  |
| Patient 2 UL30 | GREMLLATRE  | YVHARWAAFE | QLLADFPEAA | DMRAPGPYSM  | RIIYGDTSI  | FVLCRGLTAA |       | 883  |  |
| Patient 3 UL30 | GREMLLATRE  | YVHARWAAFE | QLLADFPEAA | DMRAPGPYSM  | RIIYGDTSI  | FVLCRGLTAA |       | 883  |  |
|                |             |            | 920        |             |            | 940        |       | 960  |  |
| HSV-1 KOS UL30 | GLTAMGDKMA  | SHISRALFLP | PIKLECEKTF | TKLLLI AKKK | YIGVIYGGKM | LIKGVDLVRK |       | 960  |  |
| HSV-1 17+ UL30 | GLTAMGDKMA  | SHISRALFLP | PIKLECEKTF | TKLLLI AKKK | YIGVIYGGKM | LIKGVDLVRK |       | 960  |  |
| Patient 1 UL30 | GLTAMGDKMA  | SHISRALFLP | PIKLECEKTF | TKLLLI AKKK | YIGVIYGGKM | LIKGVDLVRK |       | 943  |  |
| Patient 2 UL30 | GLTAMGDKMA  | SHISRALFLP | PIKLECEKTF | TKLLLI AKKK | YIGVIYGGKM | LIKGVDLVRK |       | 943  |  |
| Patient 3 UL30 | GLTAMGDKMA  | SHISRALFLP | PIKLECEKTF | TKLLLI AKKK | YIGVIYGGKM | LIKGVDLVRK |       | 943  |  |
|                |             |            | 980        |             | 1,000      |            | 1,020 |      |  |
| HSV-1 KOS UL30 | NNCAF INRTS | RALVDLLFYD | DTVSGAAAAL | AERPAEEWLA  | RPLPEGLQAF | GAVLVDAHRR |       | 1020 |  |
| HSV-1 17+ UL30 | NNCAF INRTS | RALVDLLFYD | DTVSGAAAAL | AERPAEEWLA  | RPLPEGLQAF | GAVLVDAHRR |       | 1020 |  |
| Patient 1 UL30 | NNCAF INRTS | RALVDLLFYD | DTVSGAAAAL | AERPAEEWLA  | RPLPEGLQAF | GAVLVDAHRR |       | 1003 |  |
| Patient 2 UL30 | NNCAF INRTS | RALVDLLFYD | DTVSGAAAAL | AERPAEEWLA  | RPLPEGLQAF | GAVLVDAHRR |       | 1003 |  |
| Patient 3 UL30 | NNCAF INRTS | RALVDLLFYD | DTVSGAAAAL | AERPAEEWLA  | RPLPEGLQAF | GAVLVDAHRR |       | 1003 |  |
|                |             |            | 1,040      |             | 1,060      |            | 1,080 |      |  |
| HSV-1 KOS UL30 | ITDPERDIQD  | FVLTAELSRH | PRAYTNKRLA | HLTVYYKLMA  | RRAQVPSIKD | RIPYVIVAQT |       | 1080 |  |
| HSV-1 17+ UL30 | ITDPERDIQD  | FVLTAELSRH | PRAYTNKRLA | HLTVYYKLMA  | RRAQVPSIKD | RIPYVIVAQT |       | 1080 |  |
| Patient 1 UL30 | ITDPERDIQD  | FVLTAELSRH | PRAYTNKRLA | HLTVYYKLMA  | RRAQVPSIKD | RIPYVIVAQT |       | 1063 |  |
| Patient 2 UL30 | ITDPERDIQD  | FVLTAELSRH | PRAYTNKRLA | HLTVYYKLMA  | RRAQVPSIKD | RIPYVIVAQT |       | 1063 |  |
| Patient 3 UL30 | ITDPERDIQD  | FVLTAELSRH | PRAYTNKRLA | HLTVYYKLMA  | RRAQVPSIKD | RIPYVIVAQT |       | 1063 |  |
|                |             |            | 1,100      |             | 1,120      |            | 1,140 |      |  |
| HSV-1 KOS UL30 | REVEETVARL  | AALRELDAAA | PGDEPAPPAA | LPSPAKRPRE  | TPSHADPPGG | ASKPRKLLVS |       | 1140 |  |
| HSV-1 17+ UL30 | REVEETVARL  | AALRELDAAA | PGDEPAPPAA | LPSPAKRPRE  | TPSHADPPGG | ASKPRKLLVS |       | 1140 |  |
| Patient 1 UL30 | REVEETVARL  | AALRELDAAA | PGDEPAPPAA | LPSPAKRPRE  | TPSHADPPGG | ASKPRKLLVS |       | 1123 |  |
| Patient 2 UL30 | REVEETVARL  | AALRELDAAA | PGDEPAPPAA | LPSPAKRPRE  | TPSHADPPGG | ASKPRKLLVS |       | 1123 |  |
| Patient 3 UL30 | REVEETVARL  | AALRELDAAA | PGDEPAPPAA | LPSPAKRPRE  | TPSHADPPGG | ASKPRKLLVS |       | 1123 |  |
|                |             |            | 1,160      |             | 1,180      |            | 1,200 |      |  |
| HSV-1 KOS UL30 | ELAEDPAYAI  | AHGVALNTDY | YFSHLLGAAC | VTFKALFGNN  | AKITESLLKR | FIPEVWHPPD |       | 1200 |  |
| HSV-1 17+ UL30 | ELAEDPAYAI  | AHGVALNTDY | YFSHLLGAAC | VTFKALFGNN  | AKITESLLKR | FIPEVWHPPD |       | 1200 |  |
| Patient 1 UL30 | ELAEDPAYAI  | AHGVALNTDY | YFSHL----- | -----       | -----      | -----      |       | 1152 |  |
| Patient 2 UL30 | ELAEDPAYAI  | AHGVALNTDY | YFSHL----- | -----       | -----      | -----      |       | 1152 |  |
| Patient 3 UL30 | ELAEDPAYAI  | AHGVALNTDY | YFSHL----- | -----       | -----      | -----      |       | 1152 |  |
|                |             |            | 1,220      |             |            |            |       |      |  |
| HSV-1 KOS UL30 | DVAARLRAAG  | FGAVGAGATA | EETRRMLHRA | FDTLA       |            |            |       | 1235 |  |
| HSV-1 17+ UL30 | DVAARLRTAG  | FGAVGAGATA | EETRRMLHRA | FDTLA       |            |            |       | 1235 |  |
| Patient 1 UL30 | -----       | -----      | -----      | -----       |            |            |       | 1152 |  |
| Patient 2 UL30 | -----       | -----      | -----      | -----       |            |            |       | 1152 |  |
| Patient 3 UL30 | -----       | -----      | -----      | -----       |            |            |       | 1152 |  |

**Fig. S3. Amino acids alignment for TK and DNA pol.** HSV-1 strains were isolated from the three participants and sequenced for genes encoding thymidine kinase (TK, UL23) and DNA polymerase (DNA pol, UL30). Letter in red color indicated changed amino acids in TK (A) and DNA pol (B). HSV-1 KOS and 17syn+ strains were used as references. Only amino-acid changes different from both KOS and 17syn+ simultaneously are considered as ACV resistant mutations.

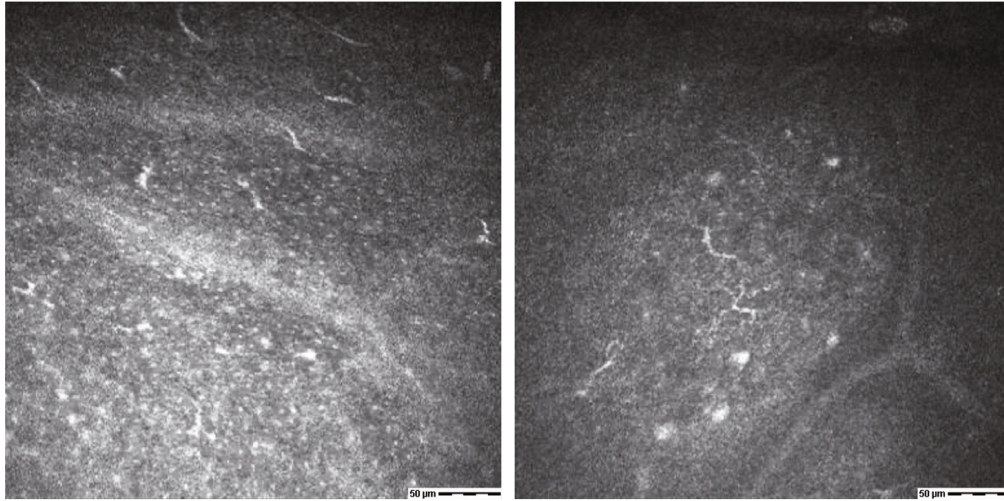

**Fig. S4. Postoperative IVCM examination of patient 1.** IVCM at 12-month post-injection showed very few corneal subbasal nerves in the transplanted corneal graft of patient 1.

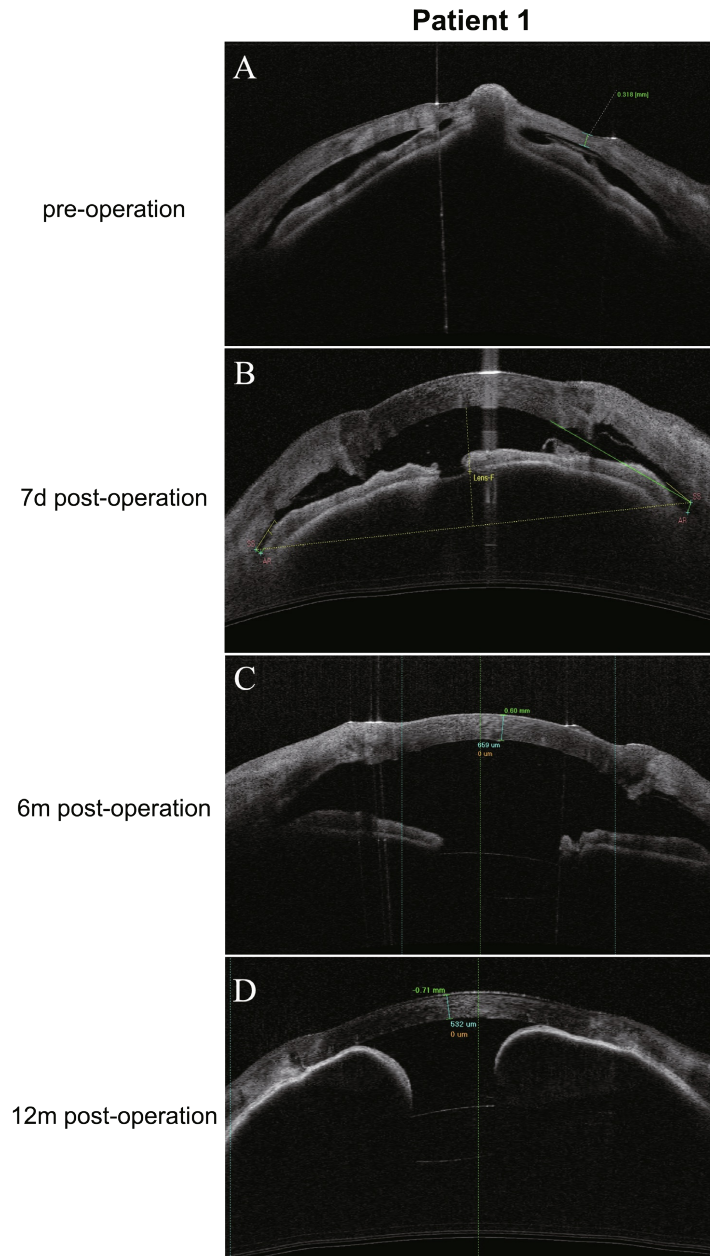

**Fig. S5. Time-domain OCT of the anterior segment of patient 1.** This image shows the time-domain OCT of the anterior segment of patient 1 at different time points (A-D). Before the injection, there was iris incarceration in the thinning area of the cornea. OCT showed a slightly shallow anterior chamber after 7 days post-injection and an iris adhesion at the 12-month visit, yet the intraocular pressure of patient 1 was within the normal range. Prophylactic laser therapy was conducted to prevent glaucoma.



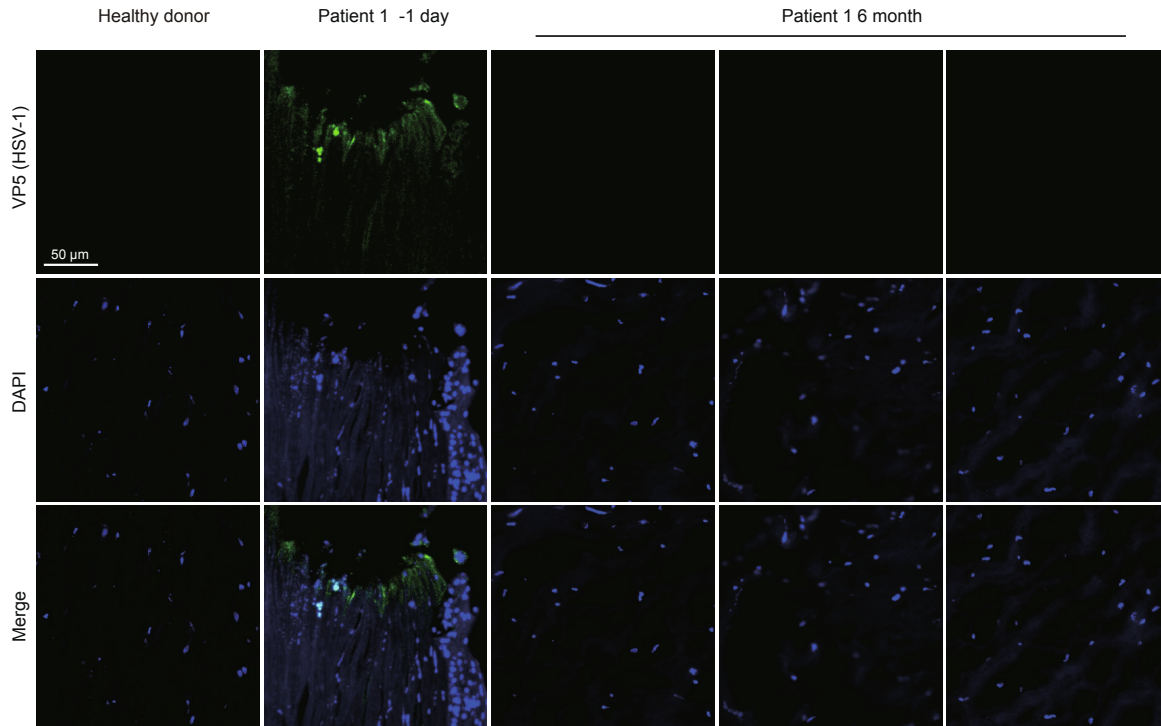

**Fig. S6. Fluorescence microscopy analysis of HSV-1 in the removed corneal button.** After the second corneal transplantation on the right eye of patient 1 at 6 months after PK, the removed corneal button showed no signs of HSV-1 capsid protein VP5 (green) by the fluorescence microscopy. Scale bars, 50 μm.

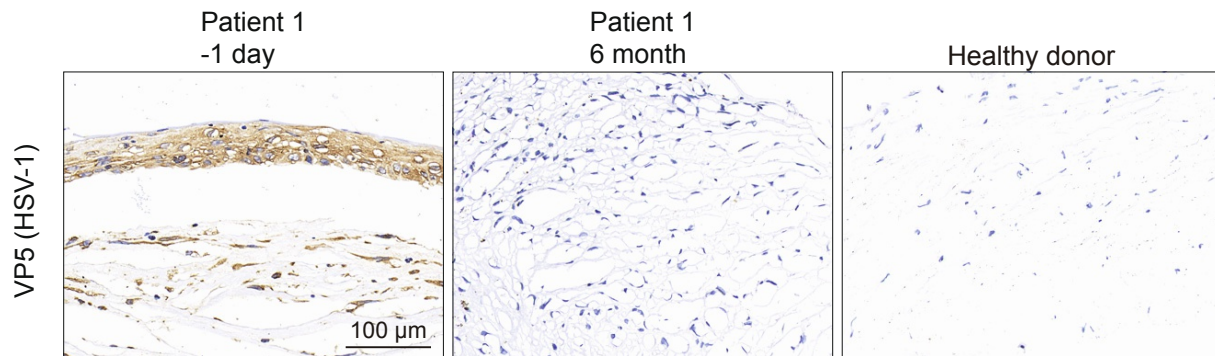

**Fig. S7. Immunohistochemistry analysis of HSV-1 in the removed corneal button from patient 1.** After the second corneal transplantation on his right eye 6 months after PK, the removed corneal button showed no signs of HSV-1 capsid protein VP5 (brown) by immunohistochemistry analysis.

Patient 2

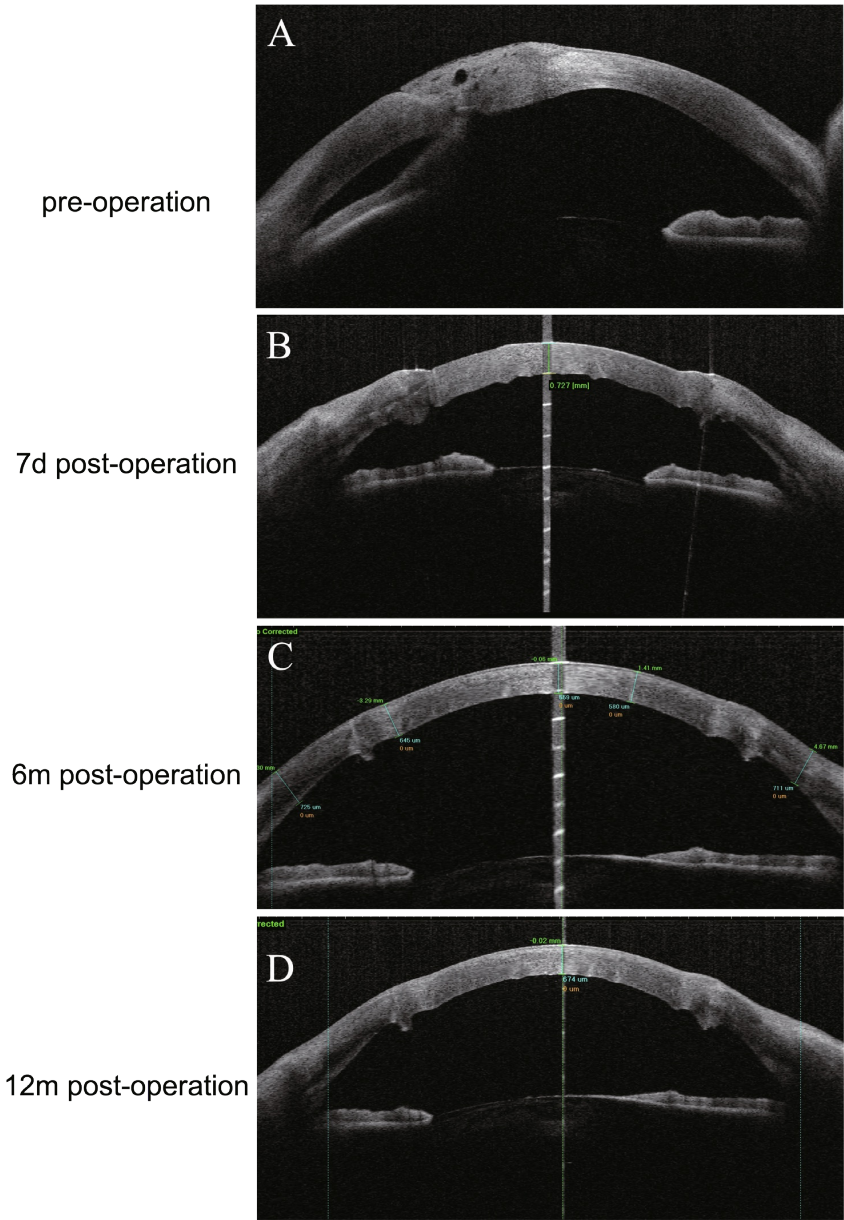

**Fig. S8. Time-domain OCT of the anterior segment of patient 2.** The pre-injection OCT of the anterior segment showed a possible corneal perforation site in patient 2 (A). Post-injection OCT images (B-D) indicate a deepened anterior chamber, which was maintained for over 12 months after the corneal transplantation.

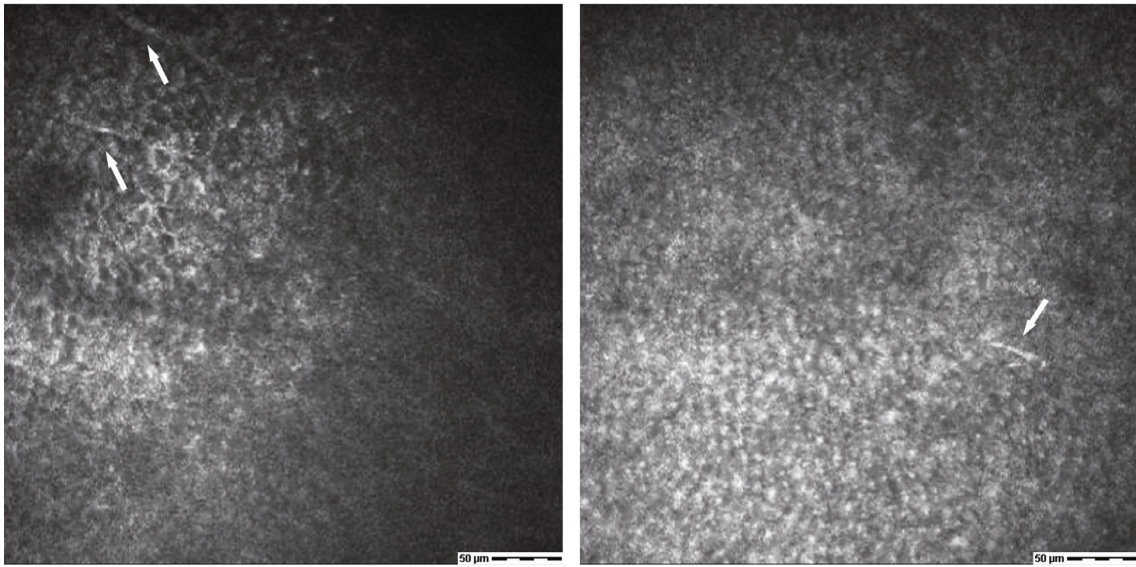

**Fig. S9. Postoperative IVCM examination of patient 2.** IVCM showed slight corneal nerve regeneration (white arrow) in the transplanted corneal graft at the 12 month-follow-up of patient 2.

**Patient 3**

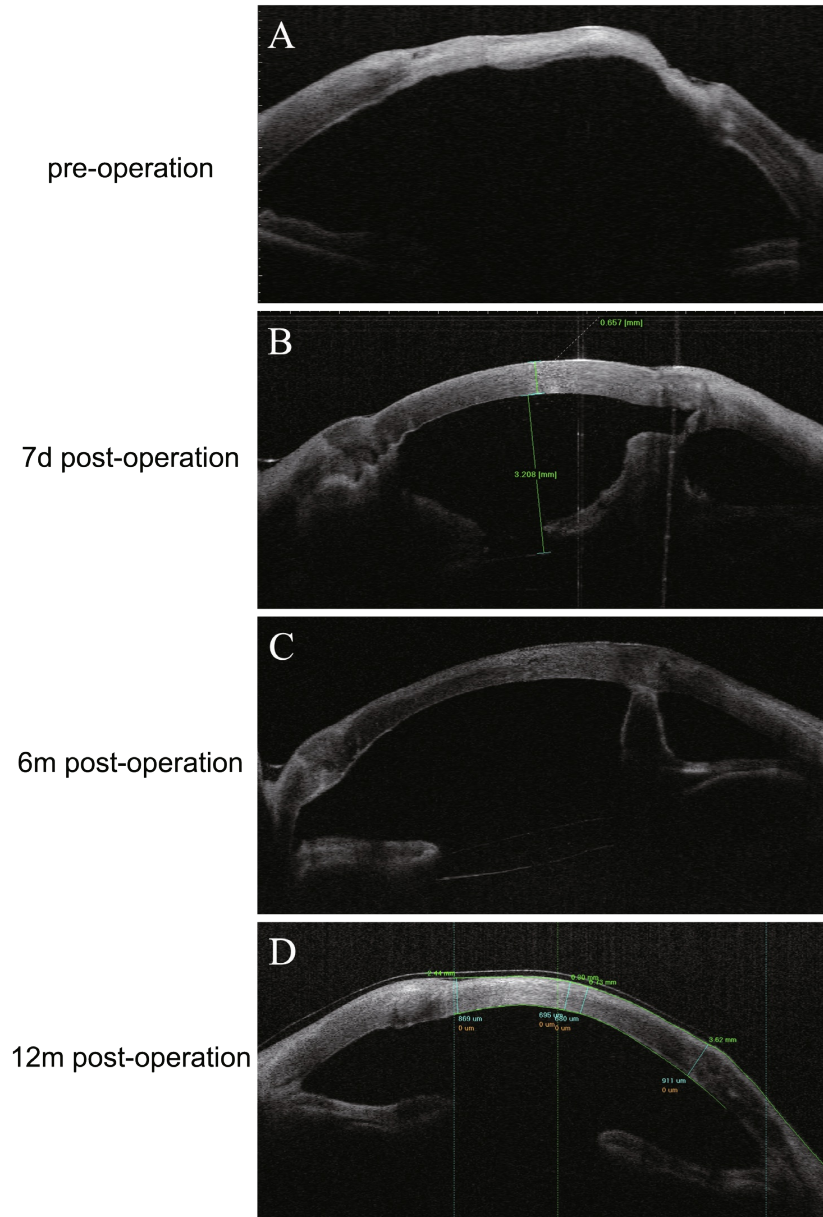

**Fig. S10. Time-domain OCT of the anterior segment of patient 3.** The pre-injection OCT of the anterior segment showed a corneal perforation channel in patient 3 (A). Post-injection OCT images (B-D) indicate an in-position intraocular lens and a slightly adhered iris to the posterior cornea after PK.

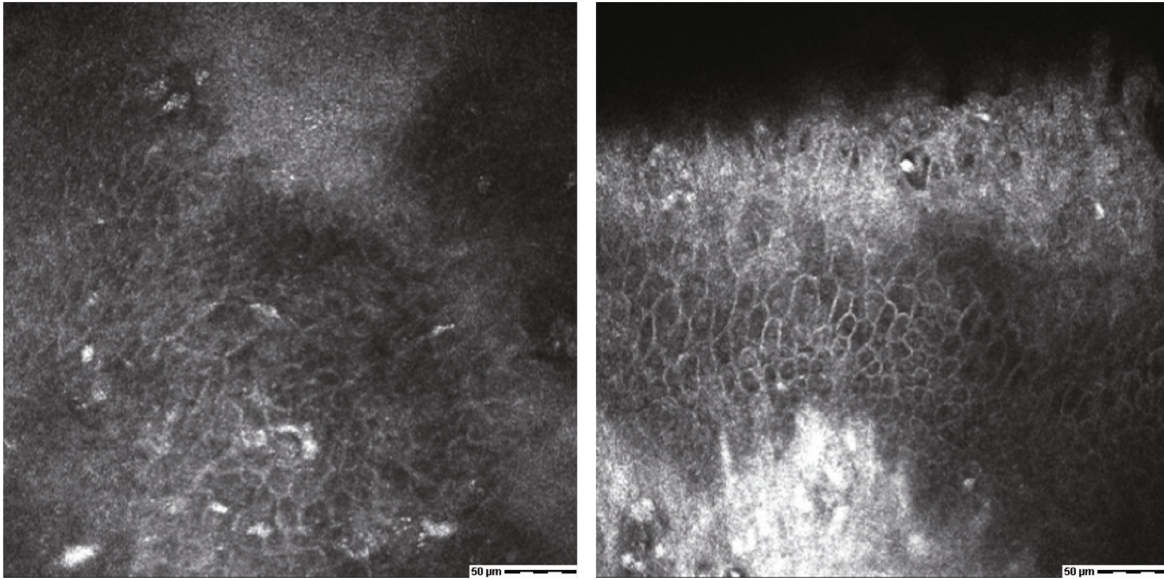

**Fig.S11. Postoperative IVCM examination of patient 3.** IVCM showed no signs of corneal nerve regeneration at the 12-month follow-up of patient 3. His corneal epithelium density decreased and showed irregular morphologic changes, which indicated the possibility of corneal neurological dystrophy related to HSK.

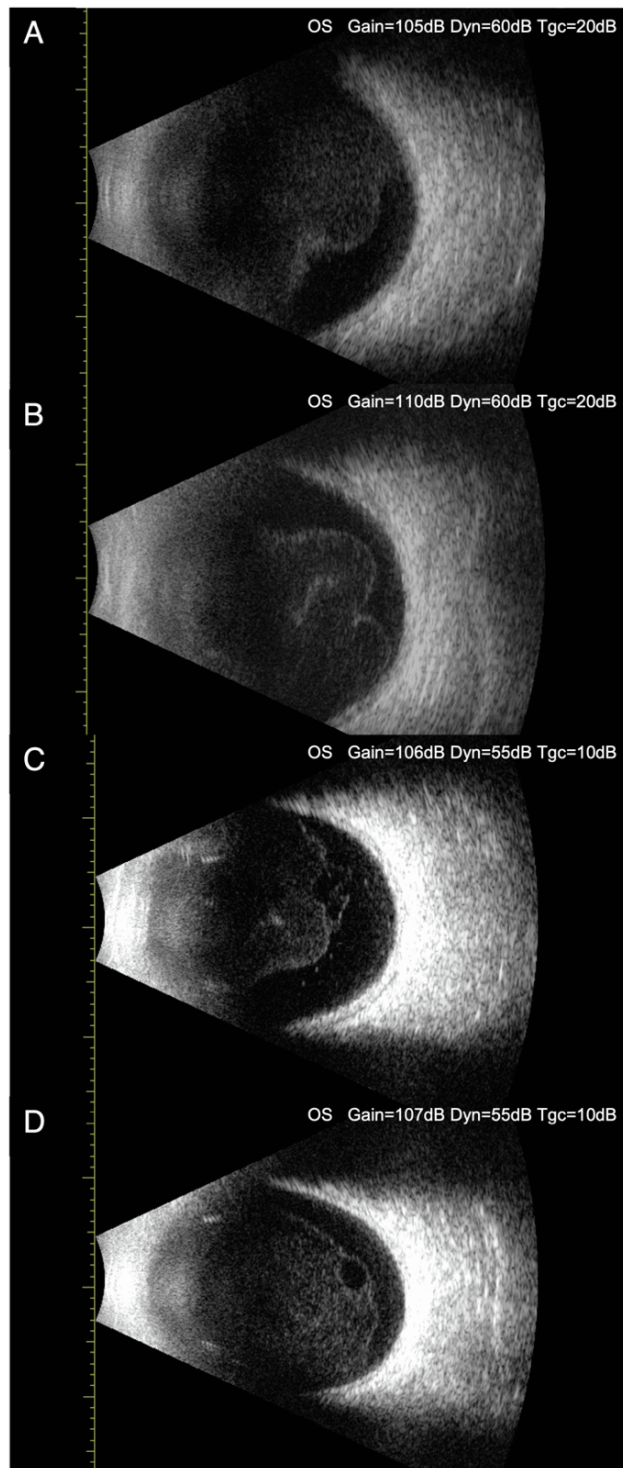

**Fig. S12. Postoperative B-scan ultrasonography of patient 3.** B-scan ultrasonography of the patient 3 on 7 days (A), 1 month (B), 3 months (C) and 6 months (D) post-injection. Continuous ribbon-like echo was found in the posterior vitreous body, indicating vitreous opacity with posterior detachment.

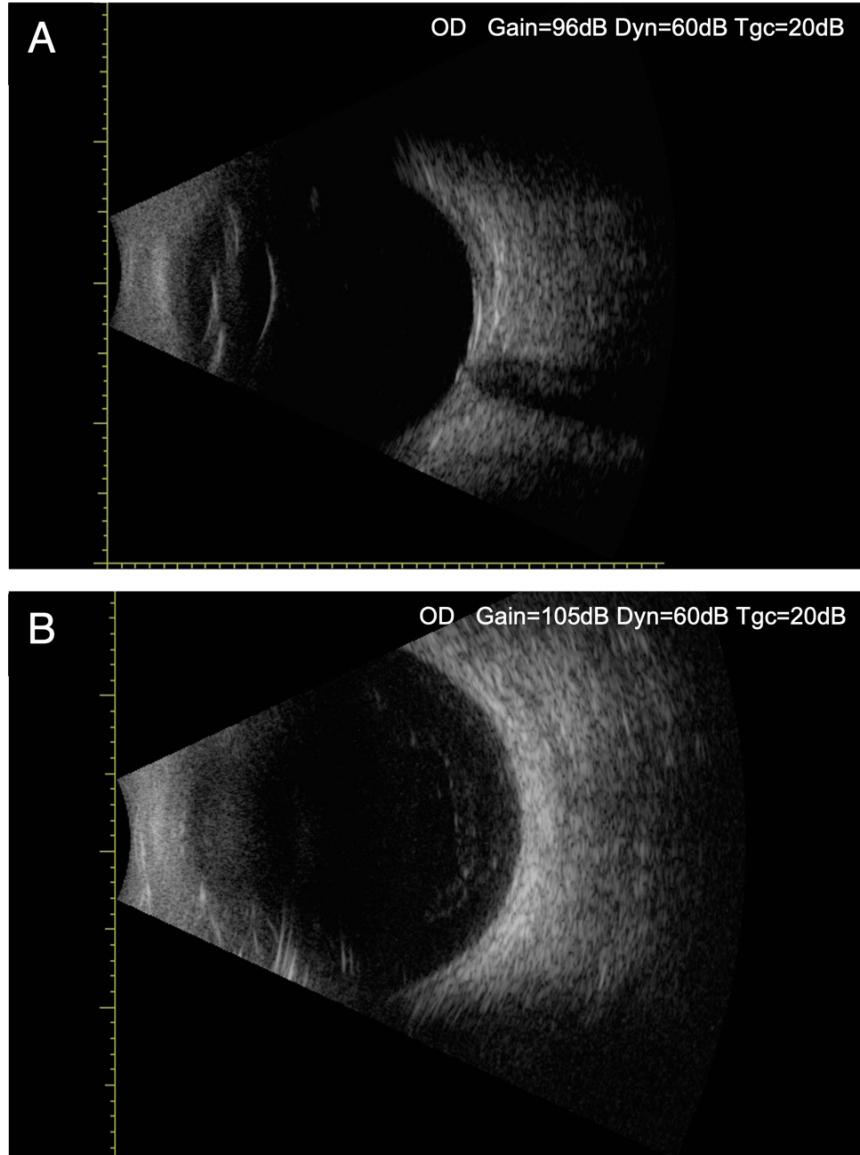

**Fig. S13. Postoperative B-scan ultrasonography of patient 2.** B-scan ultrasonography results of patient 2 on 6 months (A) and 9 months (B) post-injection showed no remarkable changes in the vitreous body.



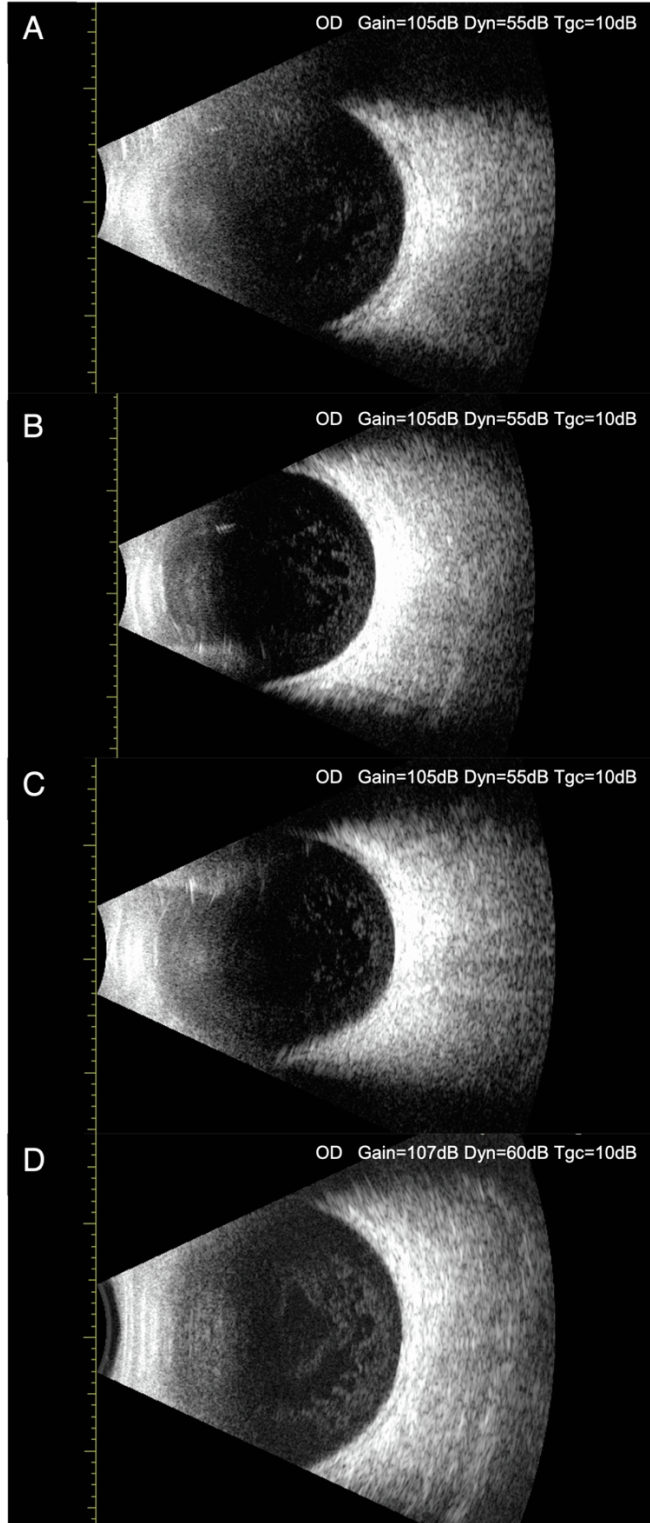

**Fig. S14. Postoperative B-scan ultrasonography of patient 1.** B-scan ultrasonography of patient 1 on 7 days (A), 1 month (B), 6 months (C) and 12 months (D) post-injection revealed no remarkable changes in the vitreous body.

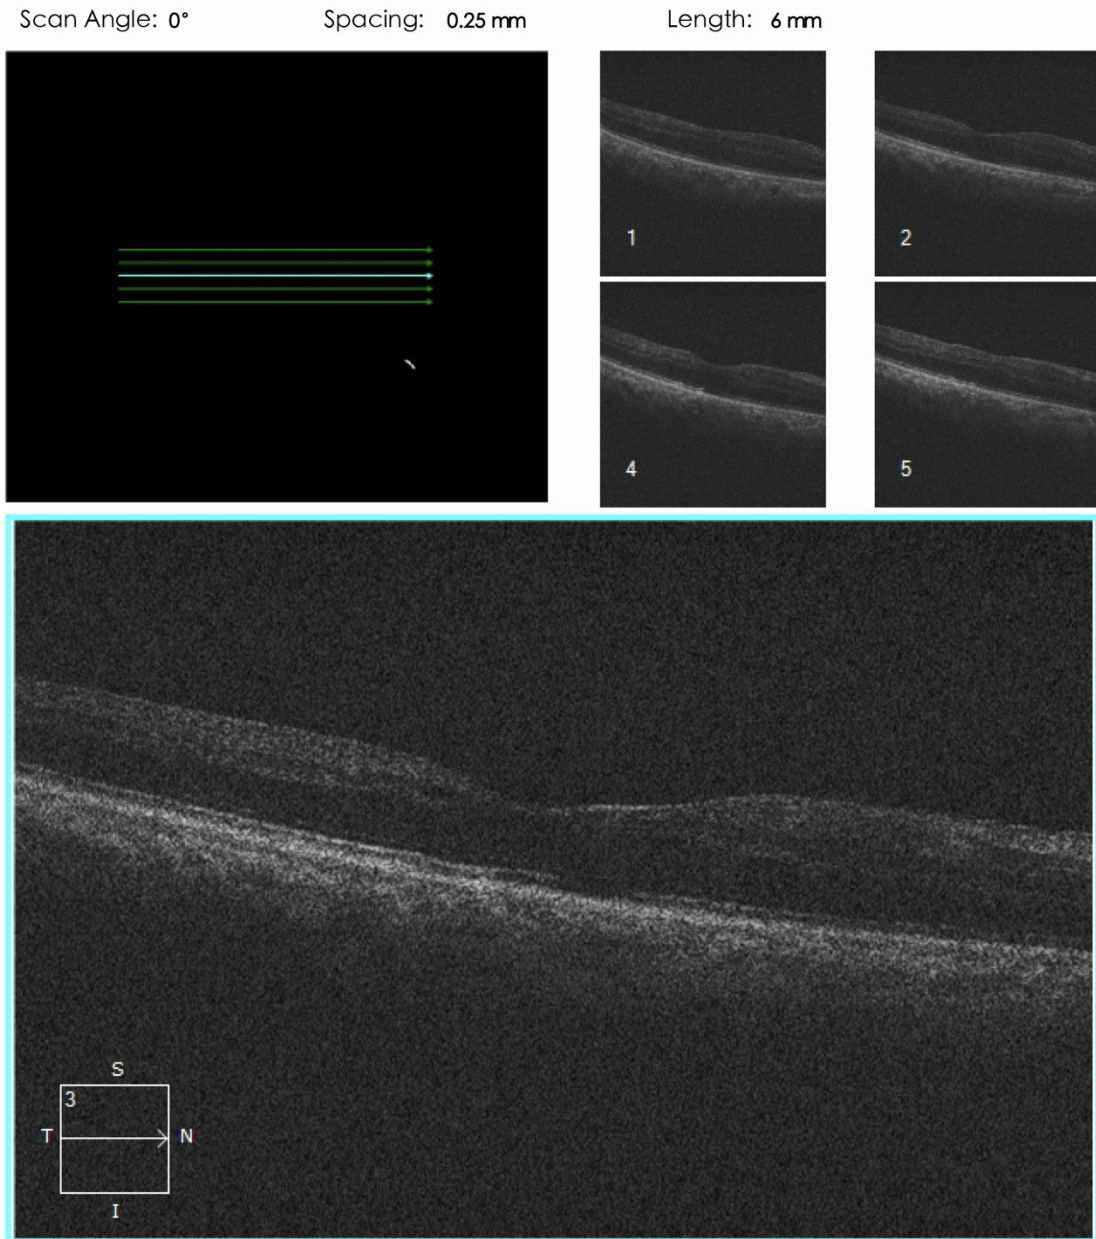

**Fig. S15. Spectral-domain OCT of the retina of patient 2.** The spectral-domain OCT of patient 2's retina was performed at 6 months post-injection using Cirrus OCT 5000 (Zeiss). The structure of his fundus showed no obvious exception after the administration of HELP.

Scan Angle: 0°

Spacing: 0.25 mm

Length: 6 mm

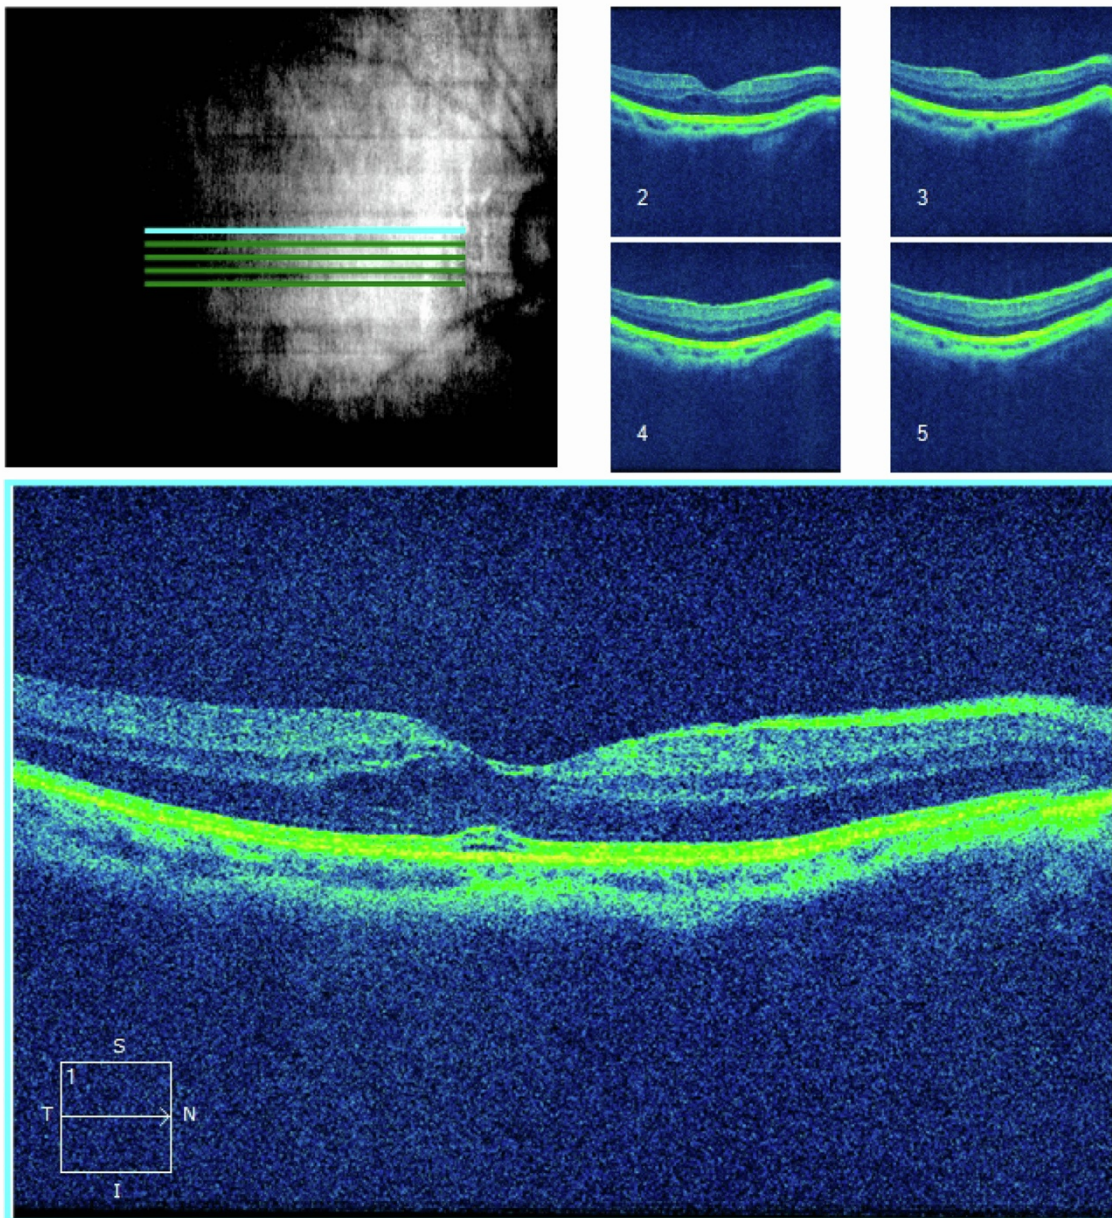

**Fig. S16. Spectral-domain OCT of the retina of patient 1.** The optical coherence tomography revealed mild center-involved intraretinal fluid and subfoveal fluid in the right eye of patient 1 at six months after the treatment. The ellipsoid zone was intact. We continue to follow up on this situation without any intervention.

A

Diagnosis:

**1\_Pattern-VEP 2.0&1.0 deg ( Monitor )**

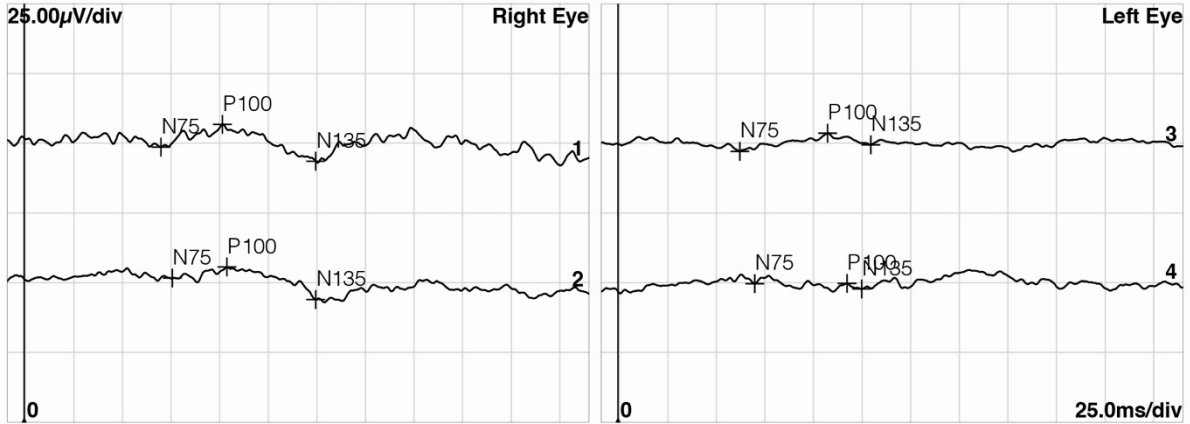

| Normals      | -        | 96-109    | -         | 7.08µV-17.7µV |           |
|--------------|----------|-----------|-----------|---------------|-----------|
| Channel      | N75 [ms] | P100 [ms] | N135 [ms] | N75-P100      | P100-N135 |
| 1 R1 2,0 deg | 70.5     | 102.2     | 150.3     | 8.13µV        | 13.3µV    |
| 2 R1 1,0 deg | 76.3     | 104.5     | 150.3     | 3.94µV (!)    | 11.7µV    |
| 3 L1 2,0 deg | 62.8     | 108.0     | 130.3     | 6.51µV (!)    | 4.14µV    |
| 4 L1 1,0 deg | 70.5     | 118.0 (!) | 125.6     | 83.5nV (!)    | 2.01µV    |

**2\_Pattern-VEP 30 min&15 min ( Monitor )**

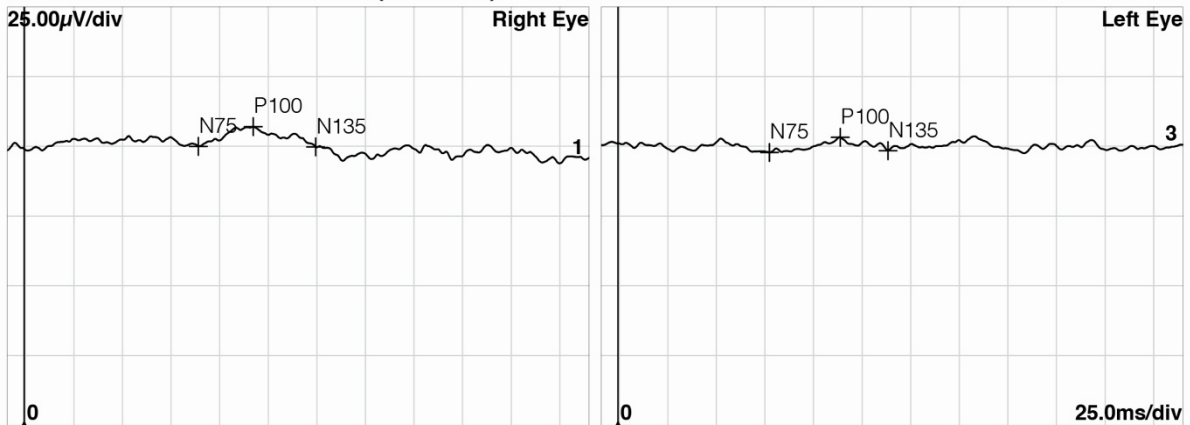

| Normals     | -        | 105-126   | -         | 7.00µV-42.5µV |           |
|-------------|----------|-----------|-----------|---------------|-----------|
| Channel     | N75 [ms] | P100 [ms] | N135 [ms] | N75-P100      | P100-N135 |
| 1 R1 30 min | 89.8     | 118.0     | 150.3     | 7.13µV        | 7.29µV    |
| 2 R1 15 min |          |           |           |               |           |
| 3 L1 30 min | 78.1     | 114.5     | 139.1     | 5.40µV (!)    | 4.80µV    |
| 4 L1 15 min |          |           |           |               |           |

B

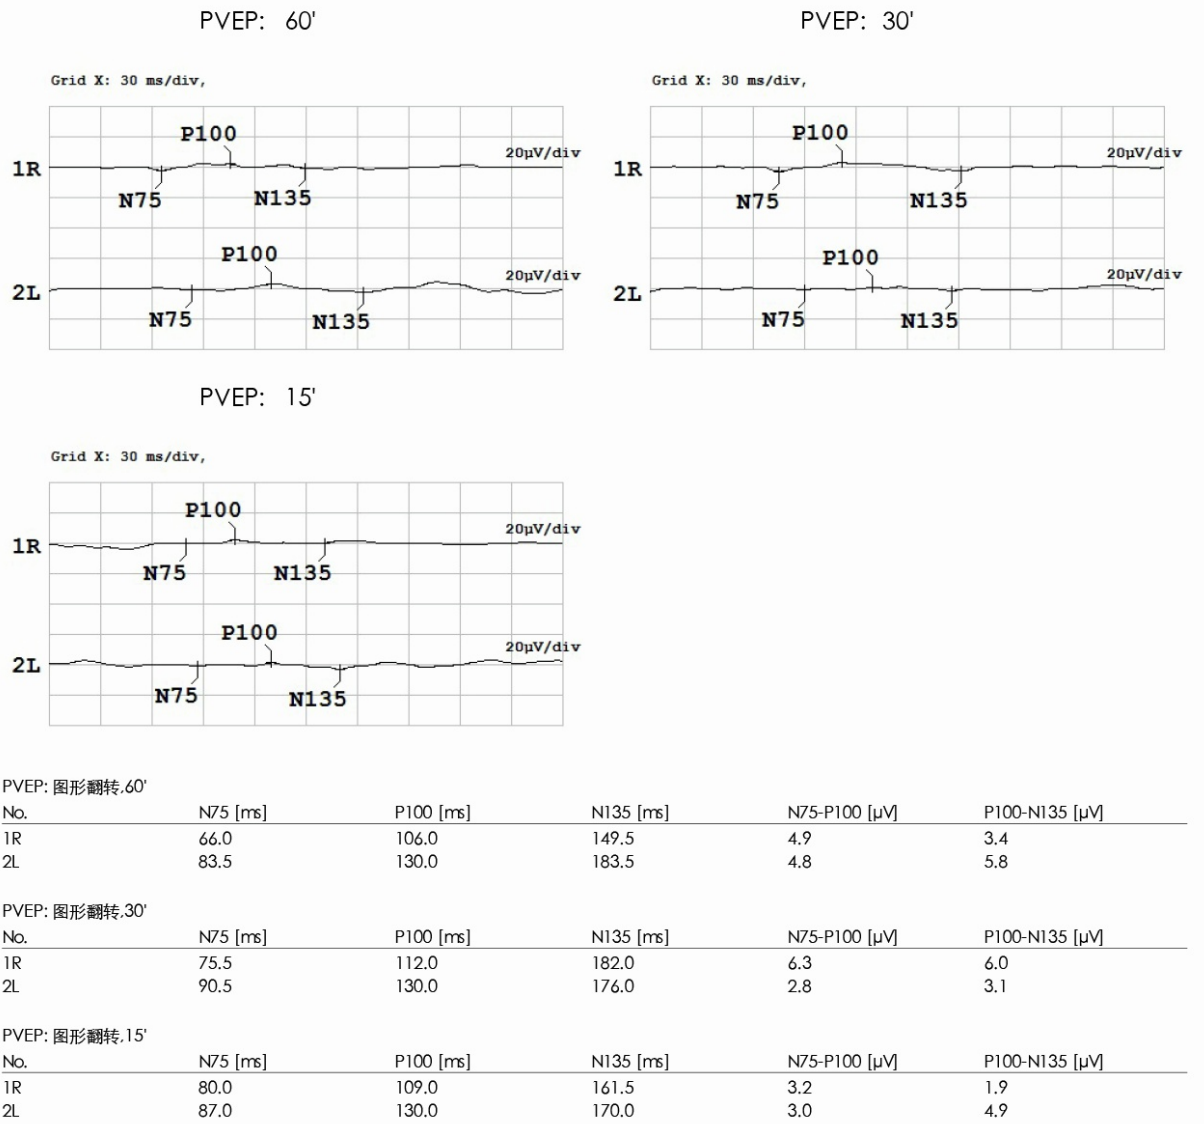

**Fig. S17. Retina ERG of patient 3.** The light-stimulated electrical activity of the retina indicates no remarkable change in terms of retinal function in patient 3 (A: pre-injection; B: six months post-injection).

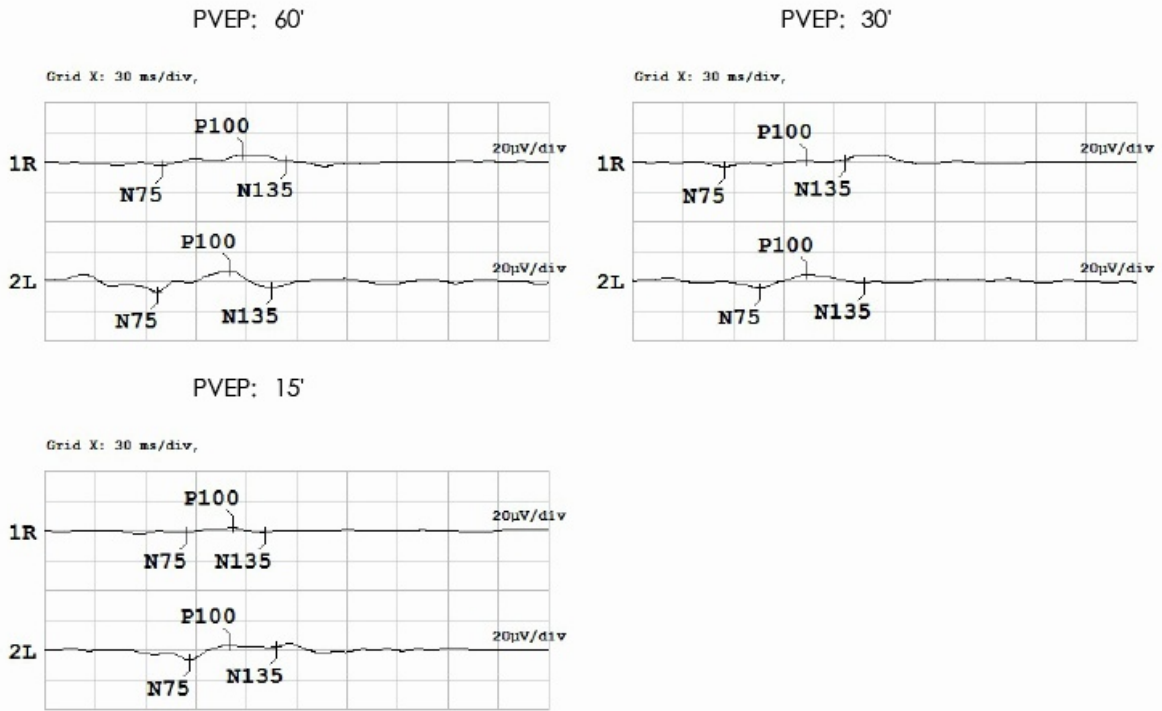

| PVEP: 图形翻转.60' |          |           |           |               |                |
|----------------|----------|-----------|-----------|---------------|----------------|
| No.            | N75 [ms] | P100 [ms] | N135 [ms] | N75-P100 [μV] | P100-N135 [μV] |
| 1R             | 70.0     | 118.5     | 144.5     | 7.9           | 4.2            |
| 2L             | 67.0     | 110.0     | 135.0     | 14.6          | 11.8           |

  

| PVEP: 图形翻转.30' |          |           |           |               |                |
|----------------|----------|-----------|-----------|---------------|----------------|
| No.            | N75 [ms] | P100 [ms] | N135 [ms] | N75-P100 [μV] | P100-N135 [μV] |
| 1R             | 55.0     | 103.5     | 126.5     | 4.7           | -0.6           |
| 2L             | 76.0     | 104.0     | 138.0     | 9.8           | 6.4            |

  

| PVEP: 图形翻转.15' |          |           |           |               |                |
|----------------|----------|-----------|-----------|---------------|----------------|
| No.            | N75 [ms] | P100 [ms] | N135 [ms] | N75-P100 [μV] | P100-N135 [μV] |
| 1R             | 84.0     | 112.0     | 131.5     | 3.9           | 4.1            |
| 2L             | 86.0     | 110.0     | 138.0     | 10.5          | 1.2            |

**Fig. S18. Retina ERG of patient 2.** The light-stimulated electrical activity of retina indicates no significant change in terms of retinal function in patient 2 twelve months after the treatment.

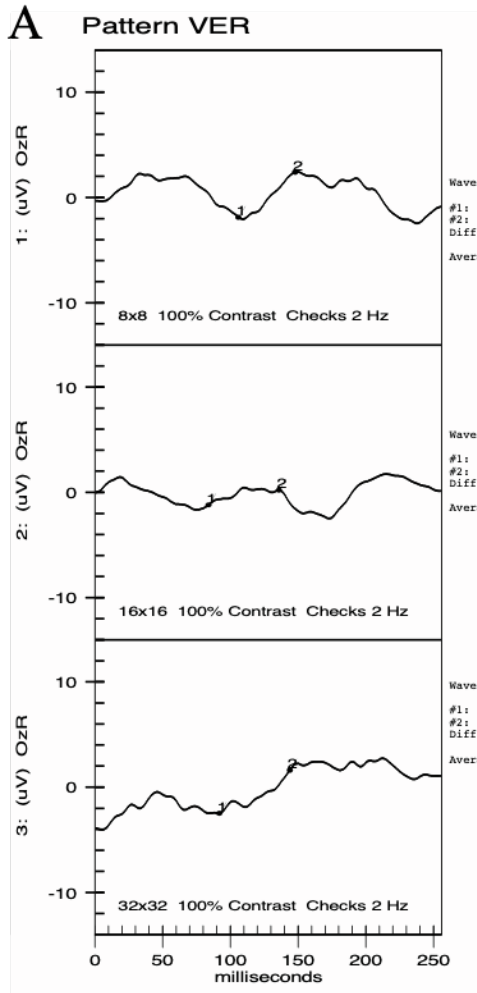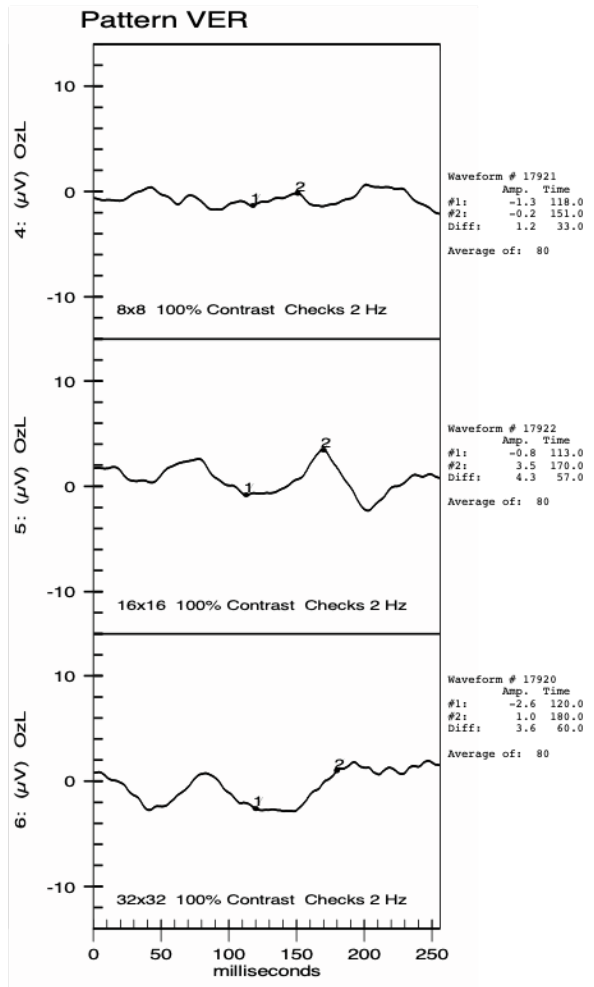

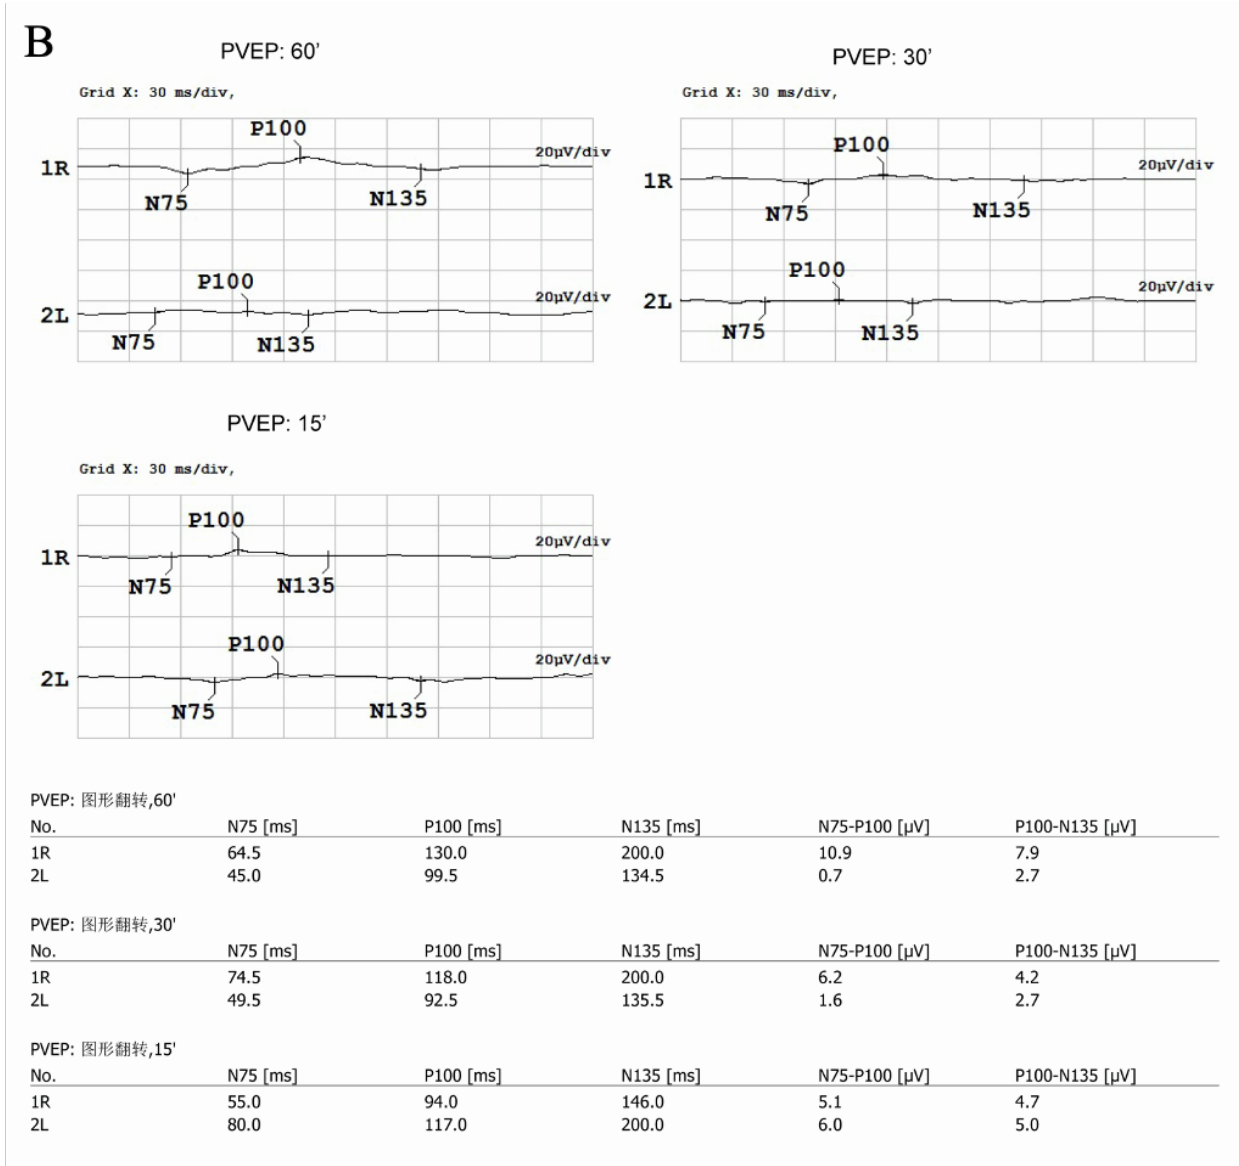

**Fig. S19. Retinal ERG examination of patient 1.** ERG detected no obvious changes of rod or cone responses to light stimulus in patient 1. (A: pre-injection; B: twelve months post-injection)



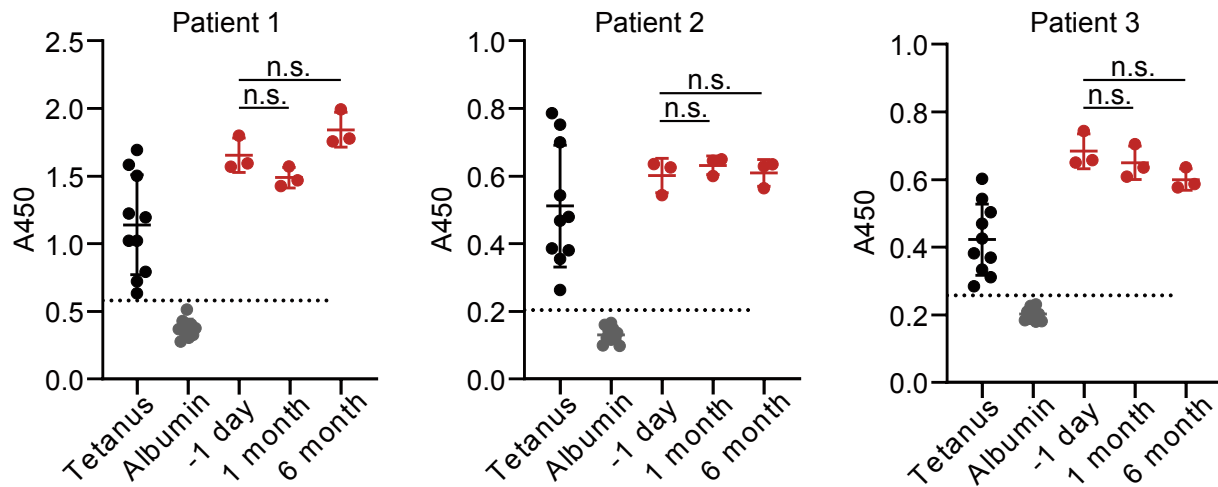

**Fig. S20. ELISA results detect antibodies against SpCas9.** Tetanus toxoid and human albumin in the sera from different donors served as a positive and negative control, respectively. The Cas9-specific antibodies were determined at different time points. The change in Cas9 antibody levels before and after HELP administration was insignificant. All samples above the dotted line were considered antibody-positive. The dotted line represents the mean absorbance of the negative control, human albumin, plus three s.d. from the mean. Data and error bars represent mean  $\pm$  s.e.m.; n.s., non-significant; unpaired two-tailed Student's t-tests.

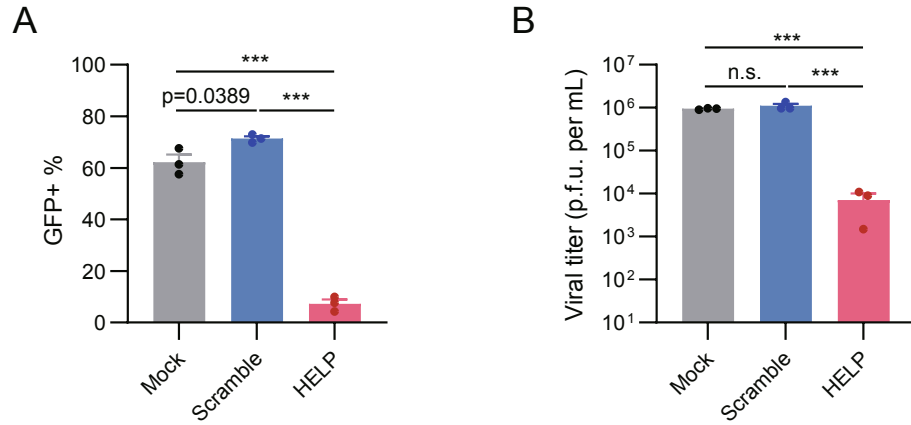

**Fig. S21. In vitro antiviral activity of the clinical grade HELP.**  $4 \times 10^4$  293T cells were seeded in a 48-well plate and transduced with 400 ng of HELP or scramble control on the following day. The medium was refreshed 12 h post-infection (h.p.i.). 24 h after transduction, cells were infected with HSV-1-GFP at an MOI of 1. The cells and supernatants were harvested at 24 and 48 h.p.i. for flow cytometry (**A**) and plaque assay (**B**), respectively. 293T cells were transduced with HELP for 24 h and then infected with HSV-1-GFP.  $n=3$  biologically independent samples. Data and error bars represent mean  $\pm$  s.e.m.; n.s., non-significant; \*\*\* $P<0.001$ ; unpaired two-tailed Student's t-tests.

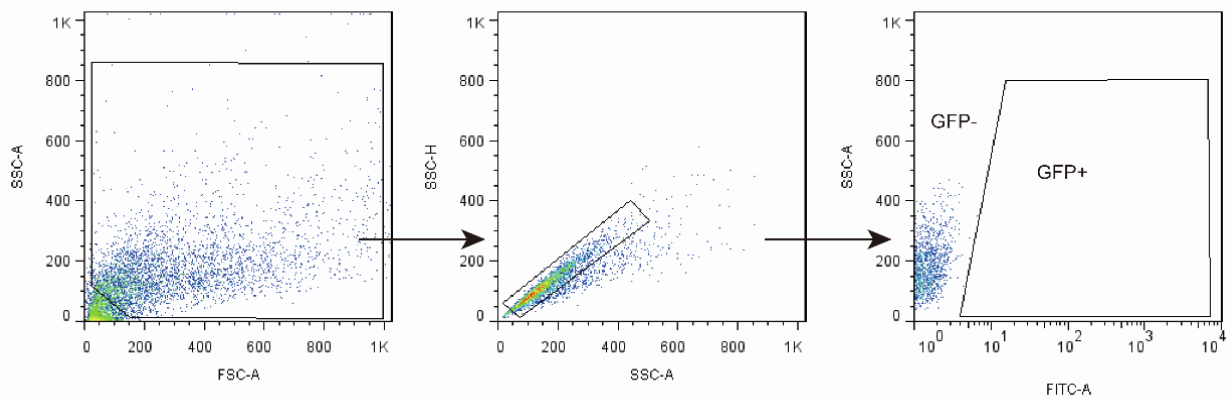

**Fig. S22. Gating strategies used for cell sorting analysis.** Gate strategy to sort GFP positive cells from HSV-1-GFP infected 293T cells on supplementary Fig. S21A.

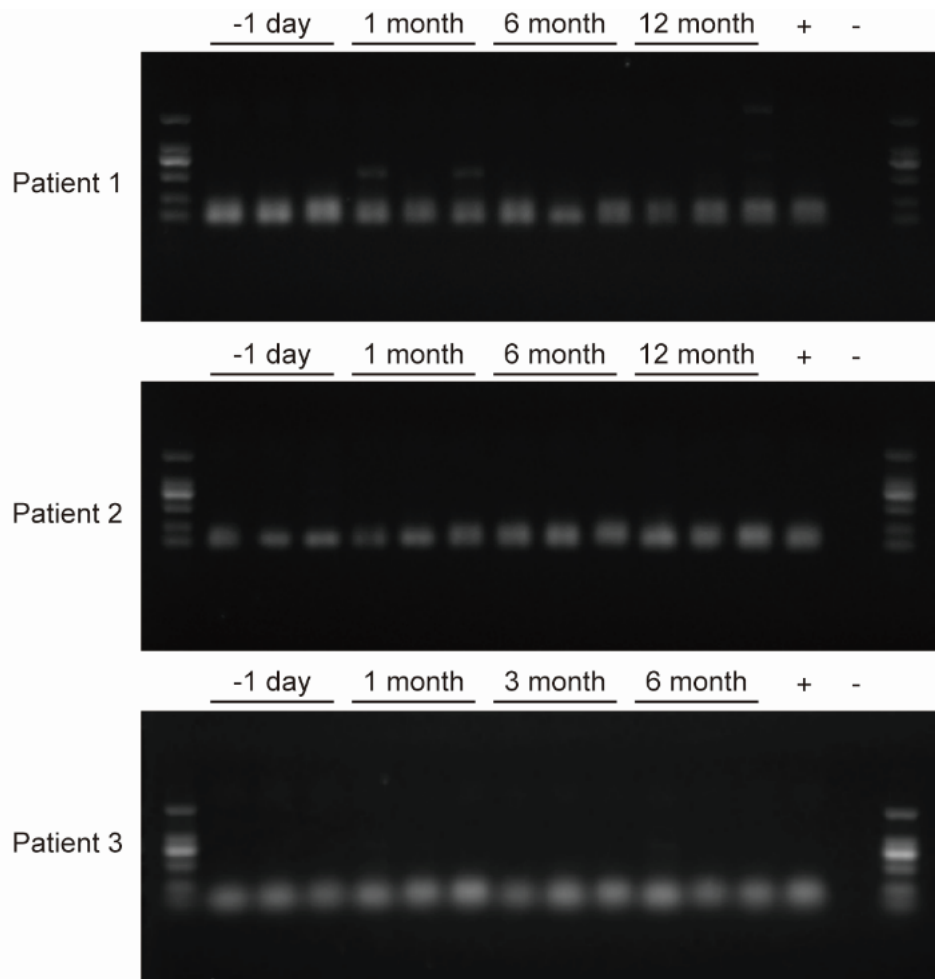

**Fig. S23. Validity of patient samples.** GAPDH gene in the tear swab of patients was tested by PCR to verify the validity of patient samples. Eye swab samples of 1 day pre-injection, 1 month, 6 months, 12 months post-injection of patient 1 & 2, and samples of 1 day pre-injection, 1 month, 3 months, 6 months post-injection of patient 3 were used as templates for PCR followed by nucleic acid gel electrophoresis. The results showed that GAPDH was positive in all samples, indicating that the swabs were valid.

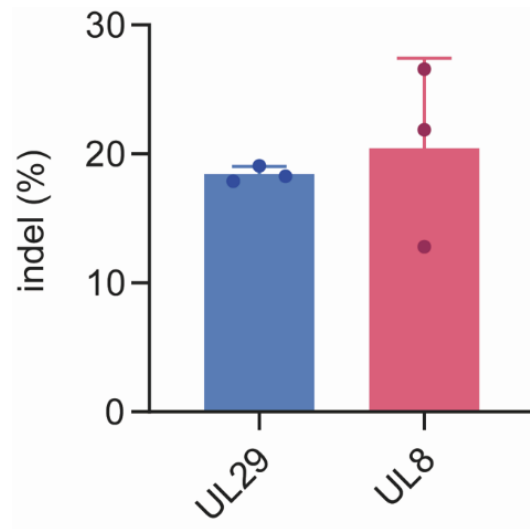

**Fig. S24. Gene editing efficiency of the clinical grade HELP.** TIDE analysis of indels in the HSV-1 genome.  $2 \times 10^4$  293T cells were incubated with 200 ng P24 HELP, then infected with HSV-1 with MOI=1 24 h later. Virus DNA was collected at 2 days post-infection for Sanger sequencing. n=3 biologically independent samples.

A

HR: 67 bpm      QRS duration: 0.09s  
P-R interval: 0.16s      Q-T interval: 0.42s  
QTc: 0.44      Axis: 66 °  
V1R+V5S: 0.71mV      V5R+V1S: 2.01mV

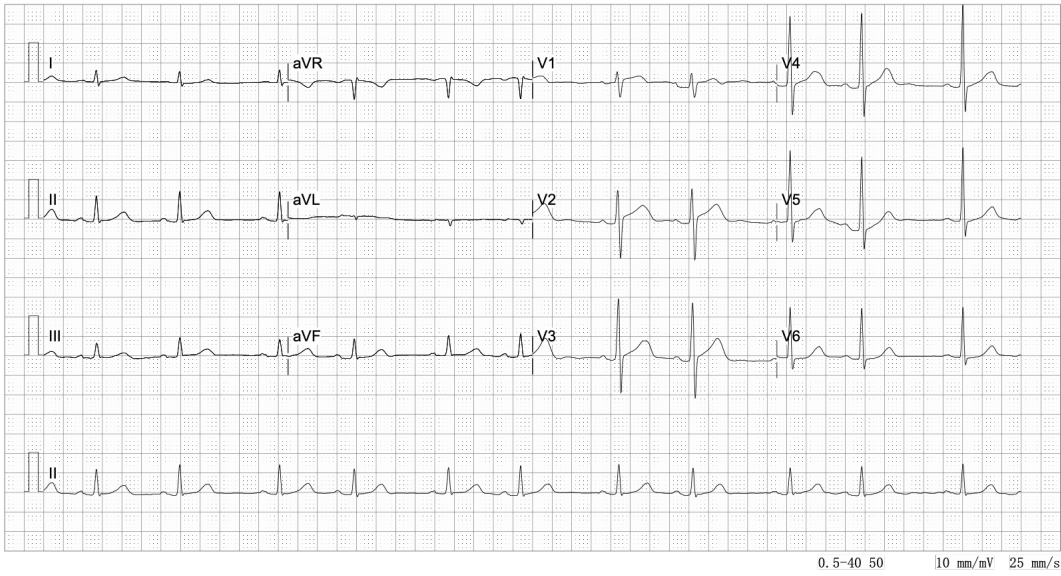

B

HR: 63 bpm      QRS duration: 0.08s  
P-R interval: 0.17s      Q-T interval: 0.41s  
QTc: 0.42      Axis: 61 °  
V1R+V5S: 0.65mV      V5R+V1S: 2.51mV

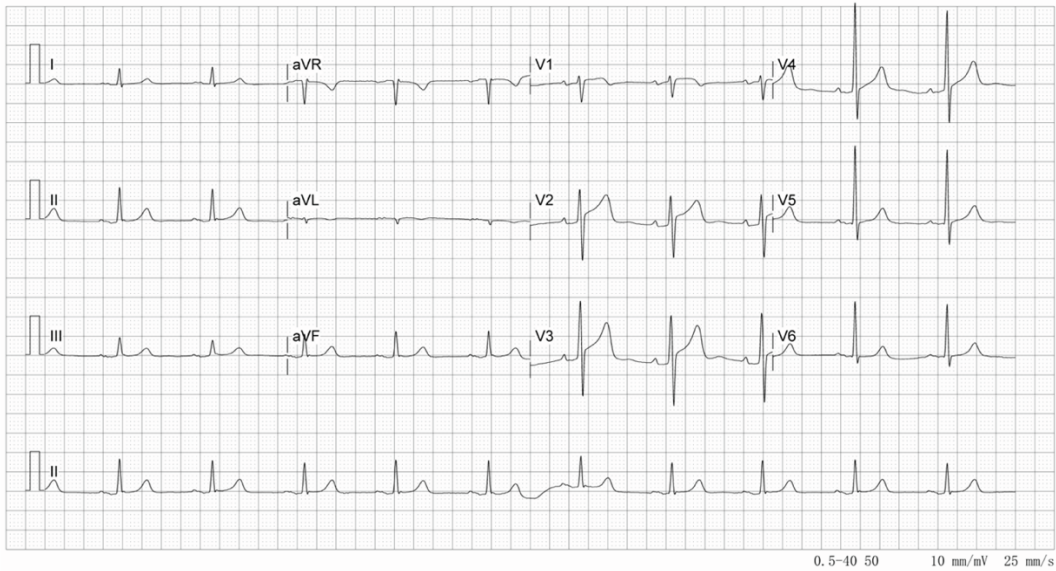

**Fig. S25. The ECG examination of patient 1.** The pre- and postoperative ECG of patient 1 was unremarkable. (A: pre-injection; B: twelve months post-injection)

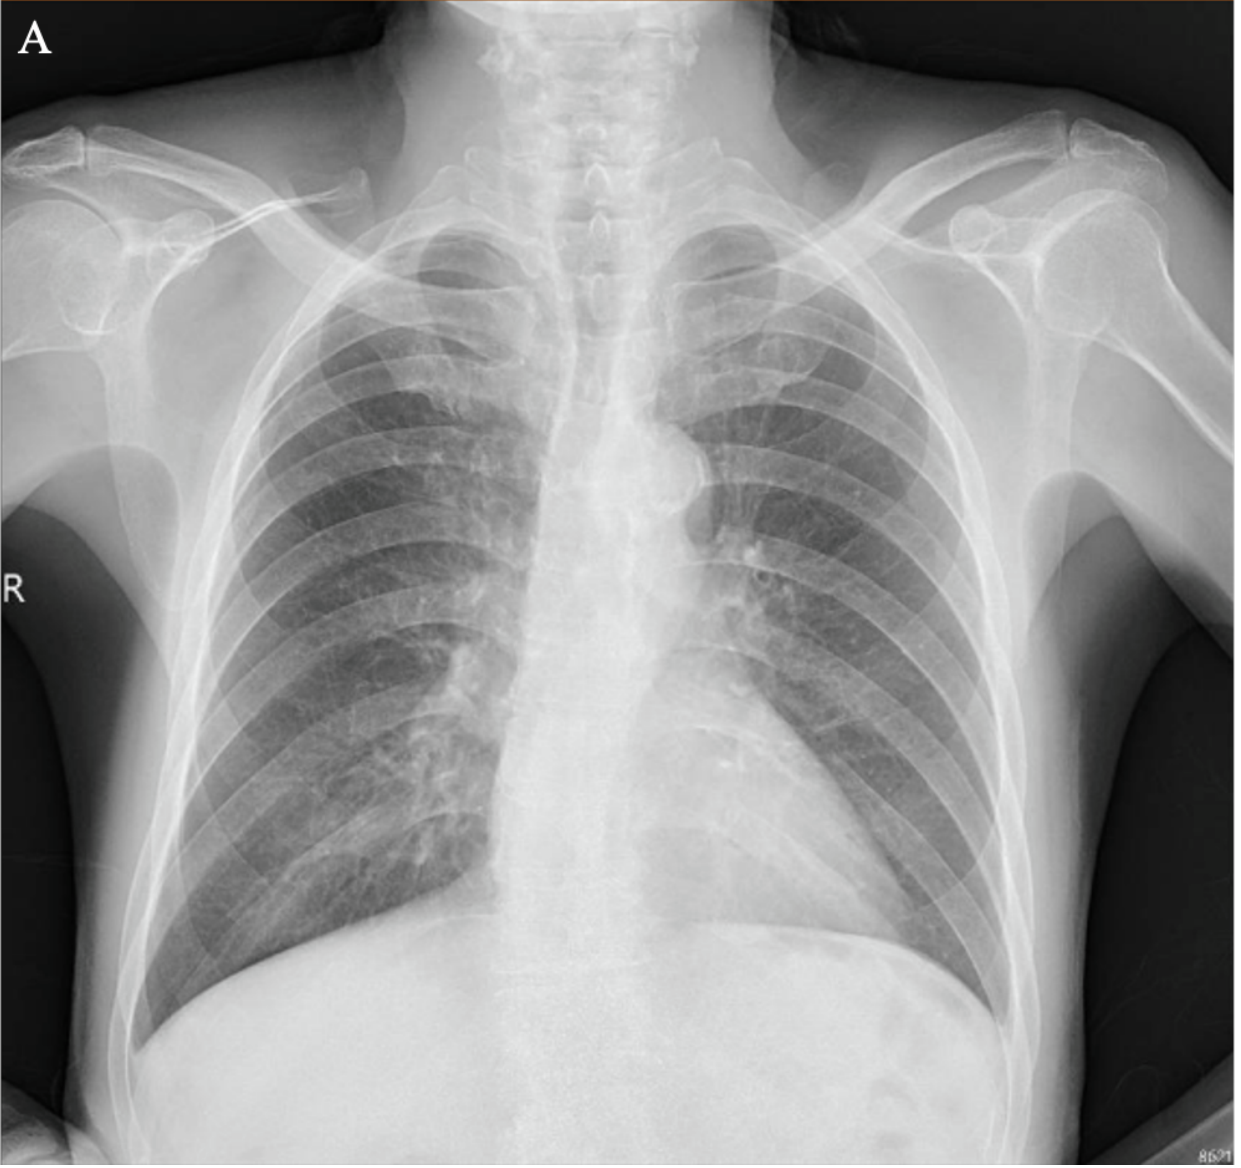

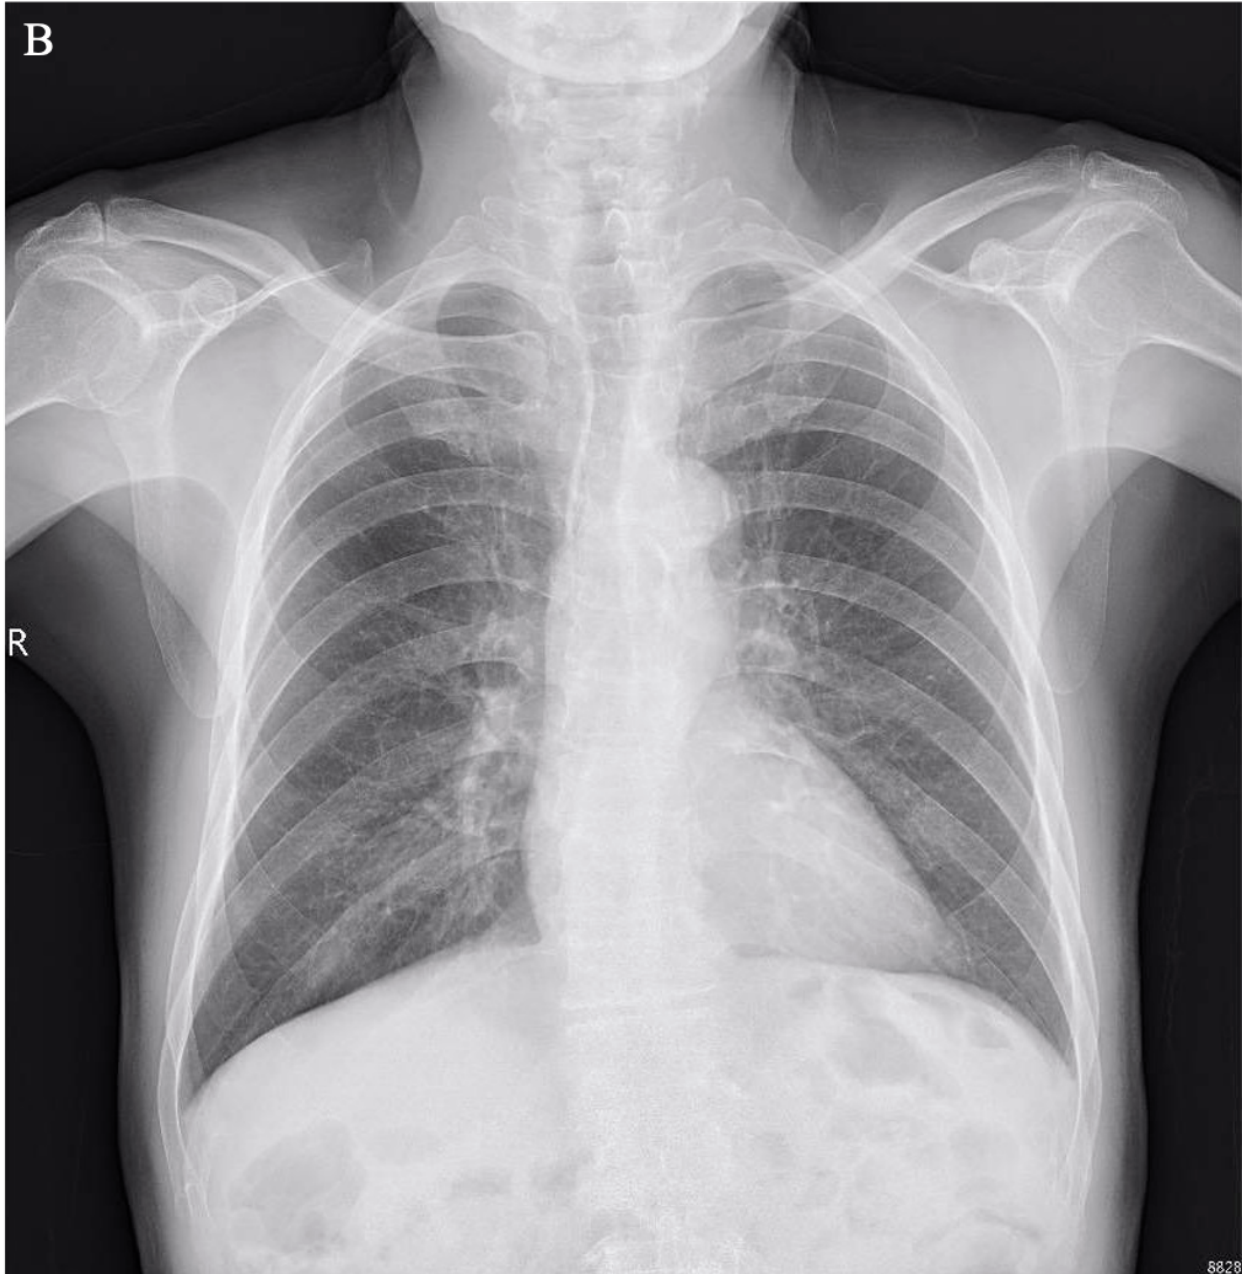

**Fig. S26. Chest X-ray examination of patient 1.** The Chest X-ray of patient 1 showed no remarkable changes before (A) and twelve months (B) after the injection.



HR: 70 bp                      QRS duration: 0.08s  
P-R interval: 0.17s        Q-T interval: 0.35s  
QTc: 0.38                    Axis: 21 °  
V1R+V5S: 0.67mV        V5R+V1S: 2.88mV

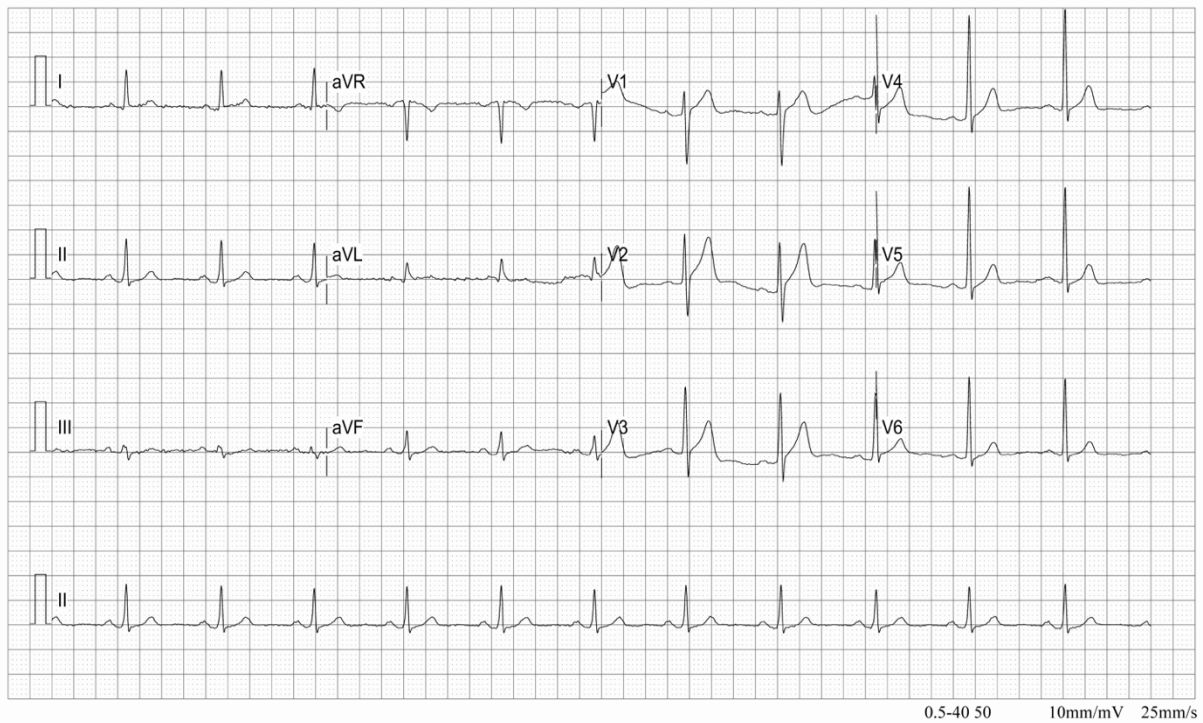

**Fig. S27. The ECG of patient 2.** The ECG of patient 2 showed counterclockwise transposition, indicating a possibly hypertrophic in the left ventricle. Slightly hypertrophy of the ventricle is not reckoned as a contraindication for corneal transplant surgery.

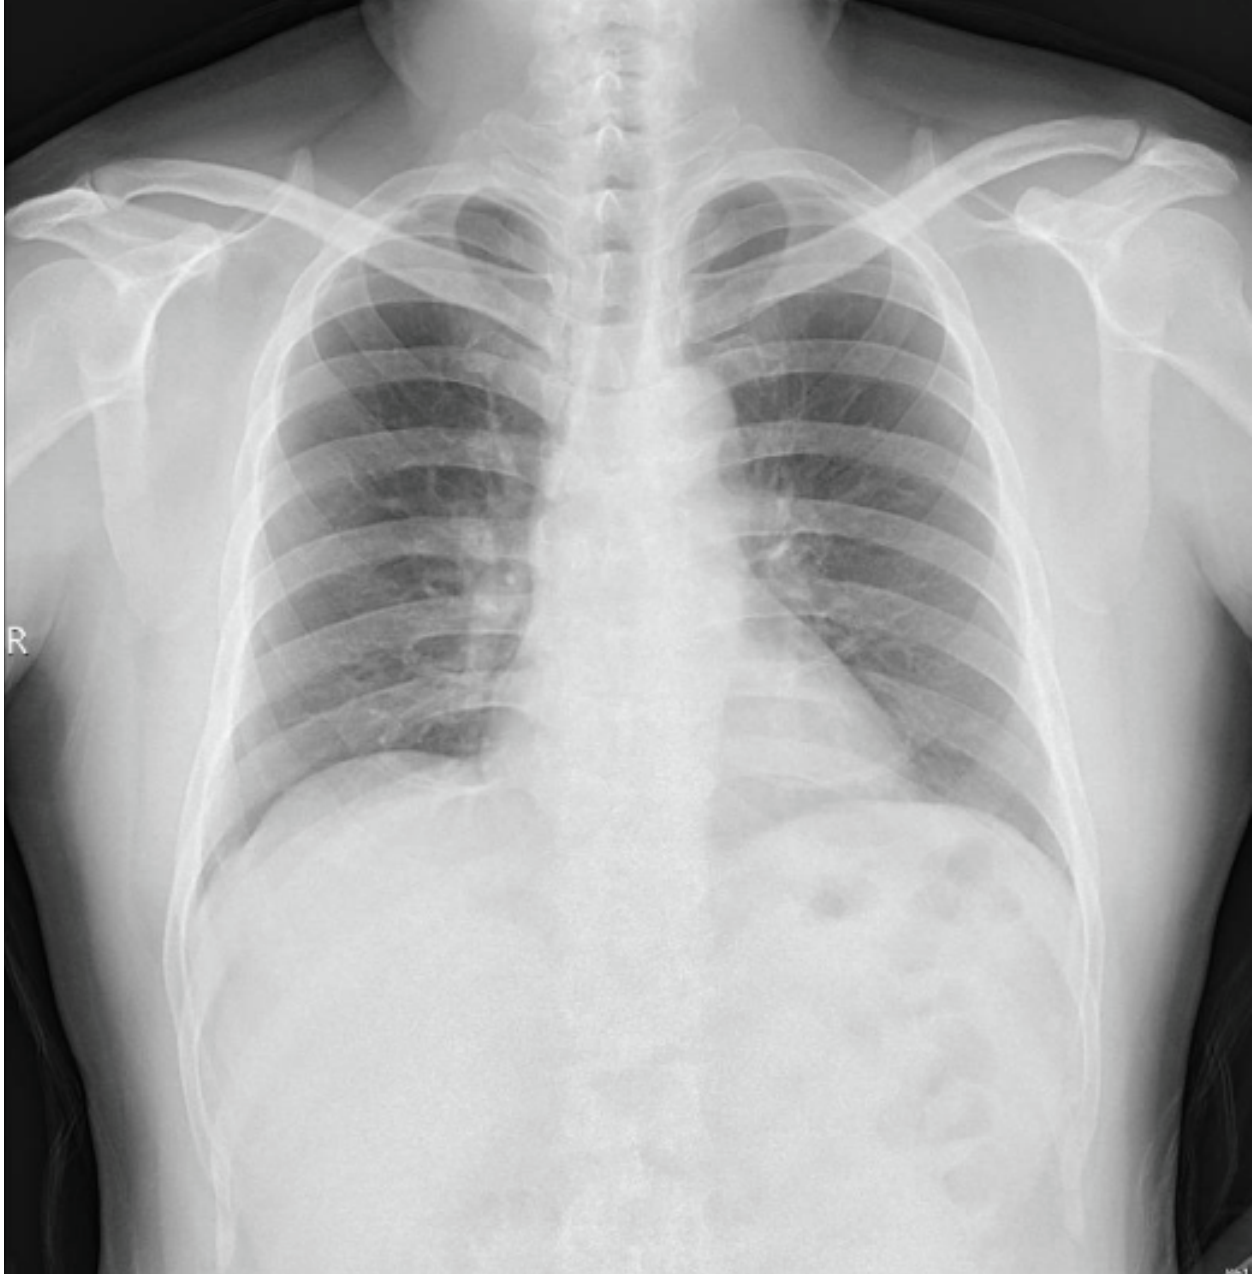

**Fig. S28. Chest X-ray film of patient 2.** The chest X-ray result of patient 2 was unremarkable.

HR: 69 bp      QRS duration: 0.08s  
P-R interval: 0.20s      Q-T interval: 0.39s  
QTc: 0.42      Axis: 54 °  
V1R+V5S: 0.35mV      V5R+V1S: 1.74mV

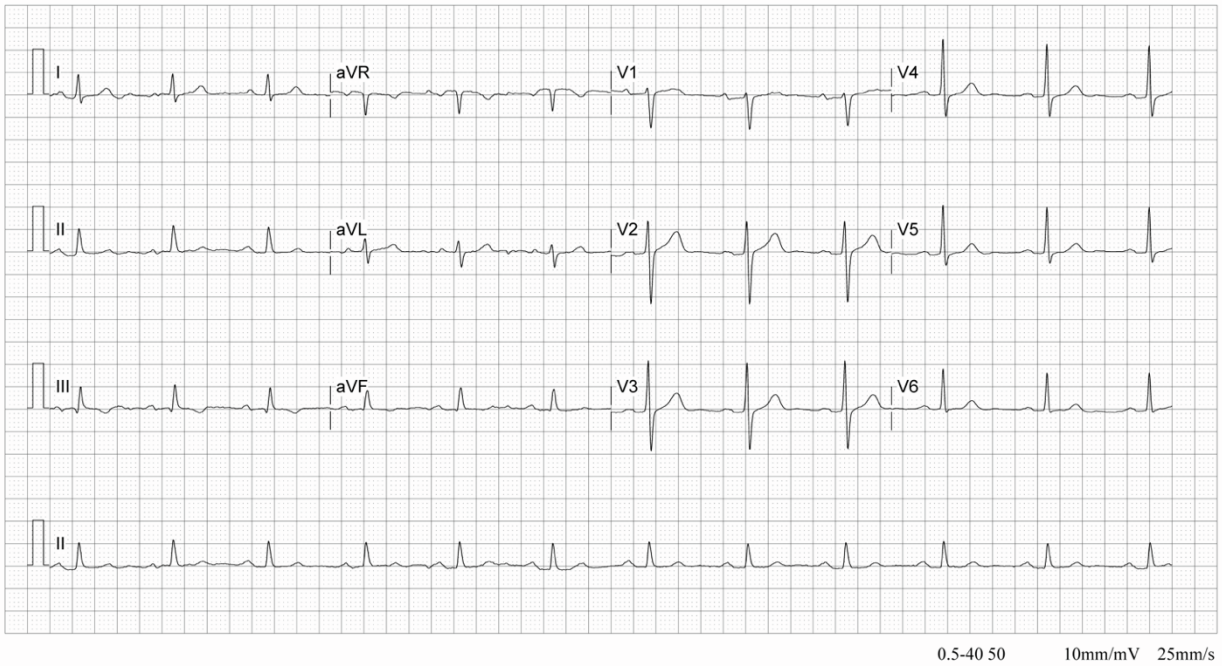

**Fig. S29. The ECG examination of patient 3.** The pre-operative ECG of patient 3 was unremarkable.

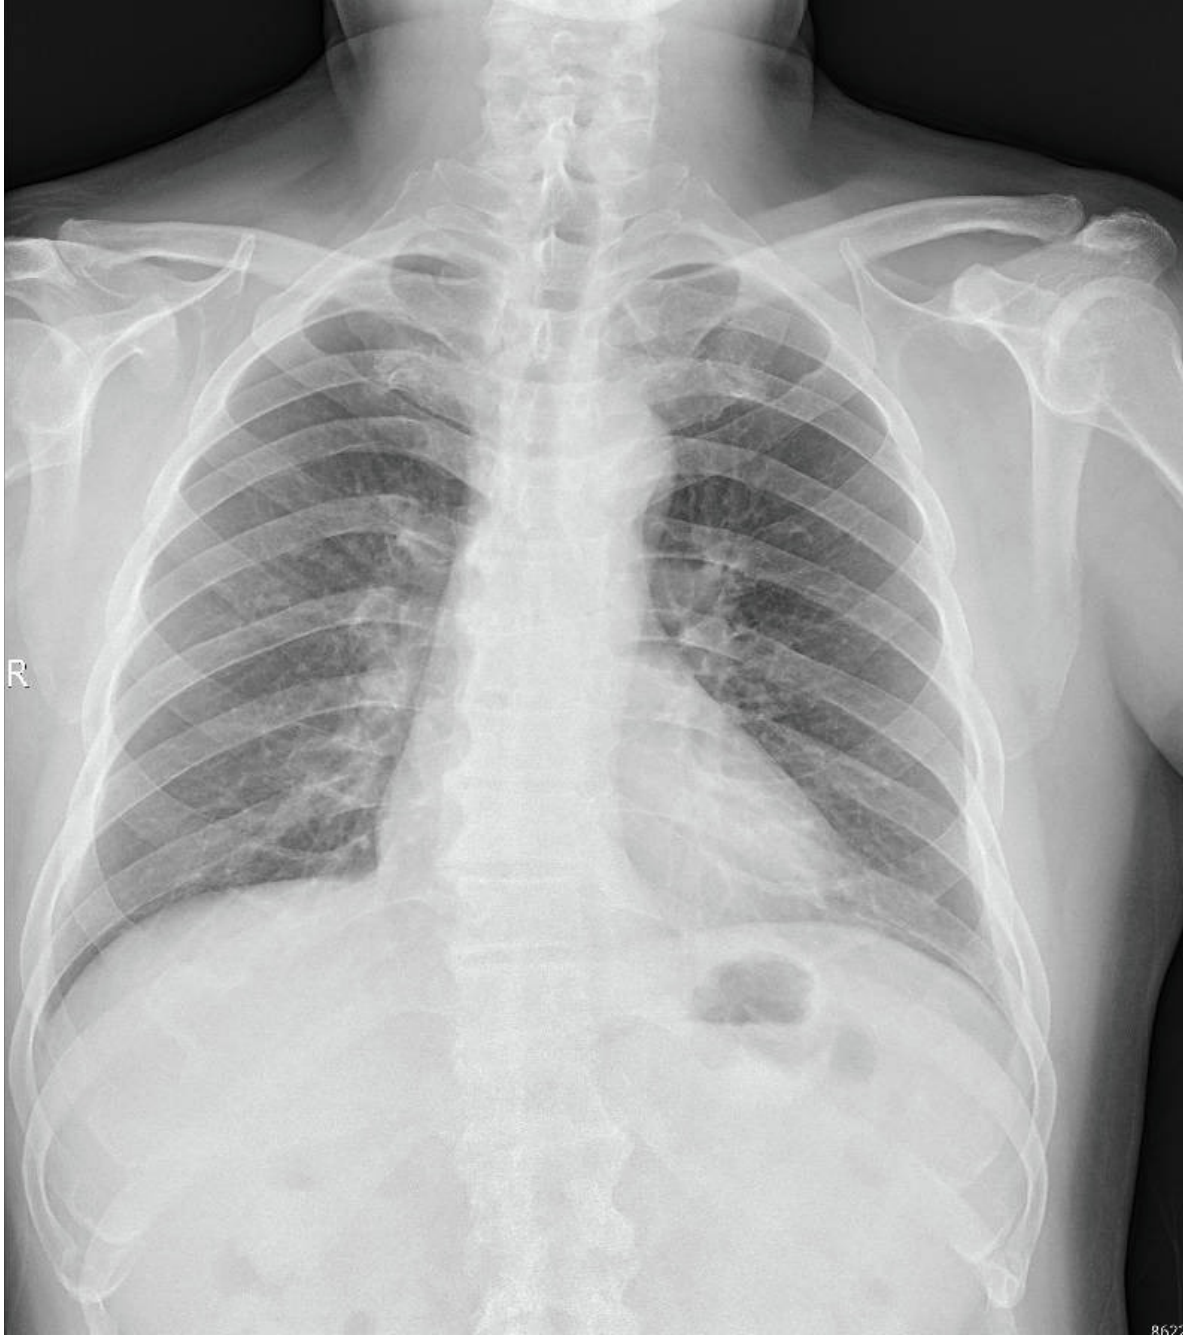

**Fig. S30. Chest X-ray film of patient 3.** The chest X-ray result of patient 3 was unremarkable.

**Table S1. Visual acuity, intraocular pressure and virus tests.**

|                  |                                     | <b>1 day</b>                                           | <b>7 days</b>              | <b>1 month</b>                                           | <b>2 months</b>       | <b>3 months</b>       | <b>6 months</b>       | <b>12 months</b>      |
|------------------|-------------------------------------|--------------------------------------------------------|----------------------------|----------------------------------------------------------|-----------------------|-----------------------|-----------------------|-----------------------|
|                  |                                     | <b>pre-injection</b>                                   | <b>post-injection</b>      | <b>post-injection</b>                                    | <b>post-injection</b> | <b>post-injection</b> | <b>post-injection</b> | <b>post-injection</b> |
| <b>Patient 1</b> | <b>Best-corrected visual acuity</b> | Light perception                                       | Finger count               | Finger count                                             | Finger count          | Finger count          | 20/100                | 20/100                |
|                  | <b>Intraocular pressure (mmHg)</b>  | Undetectable                                           | 12.0                       | 10.4                                                     | 16                    | 15.3                  | 8                     | 21.3                  |
|                  | <b>HSV-1 tests (Ct value)</b>       | 21.35 (Cornea)<br>28.37 (Aqueous)<br>30.55*(Tear swab) | -<br>24.09(Tear swab)<br>- | 28.37(Tear swab)<br>31.49(Tear swab)<br>31.08(Tear swab) | -<br>-<br>-           | -<br>-<br>-           | -<br>-<br>-           | -<br>-<br>-           |
| <b>Patient 2</b> | <b>Best-corrected visual acuity</b> | Hand motion                                            | 20/250                     | 20/167                                                   | 20/100                | 20/67                 | 20/133                | 20/133                |
|                  | <b>Intraocular pressure (mmHg)</b>  | Undetectable                                           | 11.0                       | 16.3                                                     | 16.4                  | 12.4                  | 7.3                   | 15.0                  |
|                  | <b>HSV-1 tests (Ct value)</b>       | 26.34 (Cornea)<br>36.50 (Aqueous)<br>35.01*(Tear swab) | -<br>-<br>-                | -<br>-<br>-                                              | -<br>-<br>-           | -<br>-<br>-           | -<br>-<br>-           | -<br>-<br>-           |
| <b>Patient 3</b> | <b>Best-corrected visual acuity</b> | Hand motion                                            | Hand motion                | Hand motion                                              | Hand motion           | Hand motion           | Hand motion           | Finger count          |
|                  | <b>Intraocular pressure (mmHg)</b>  | Undetectable                                           | n.a.                       | 15.0                                                     | 24.1                  | 18.5                  | 18.1                  | 19.3                  |
|                  | <b>HSV-1 tests (Ct value)</b>       | 34.9 (Cornea)<br>- (Aqueous)<br>29.5 (Tear swab)       | -<br>-<br>-                | -<br>-<br>-                                              | -<br>-<br>-           | -<br>-<br>-           | -<br>-<br>-           | -<br>-<br>-           |

\*Mean HSV-1 titer (Ct value) of three simultaneously sampled tear swabs; n.a., not available; -, Ct value undetectable.

**Table S2. List of adverse events.**

| <b>Patient</b> | <b>Adverse Event</b>       | <b>Start Date</b> | <b>End Date</b> | <b>Placebo Related</b> | <b>Severity</b> | <b>Outcome</b> | <b>Treatment</b>                    |
|----------------|----------------------------|-------------------|-----------------|------------------------|-----------------|----------------|-------------------------------------|
| 1              | corneal edema              | 11/2020           | 11/2020         | possibly related       | mild            | resolved       | concomitant medication              |
|                | conjunctival injection     | 11/2020           | 11/2020         | unlikely to be related | mild            | resolved       | concomitant medication              |
|                | hyphema                    | 11/2020           | 11/2020         | unrelated              | mild            | resolved       | none                                |
|                | neurotrophic keratitis     | 5/2021            | /               | unrelated              | mild            | unresolved     | concomitant medication              |
|                | uncontrolled corneal ulcer | 9/2021            | 11/2021         | unrelated              | moderate        | resolved       | penetrating keratoplasty            |
|                | cataract                   | n.a.              | 11/2021         | unrelated              | mild            | resolved       | cataract surgery                    |
|                | secondary glaucoma         | 10/2021           | 12/2021         | unrelated              | mild            | resolved       | concomitant medication              |
| 2              | corneal edema              | 1/2021            | 1/2021          | possibly related       | mild            | resolved       | concomitant medication              |
|                | conjunctival injection     | 1/2021            | 1/2021          | unlikely to be related | mild            | resolved       | concomitant medication              |
|                | itching                    | 2/2021            | 3/2021          | unrelated              | mild            | resolved       | concomitant medication              |
|                | endophthalmitis            | 7/2021            | 7/2021          | unrelated              | moderate        | resolved       | vitrectomy and antibiotic injection |
|                | cataract                   | n.a.              | /               | unrelated              | mild            | unresolved     | none                                |
| 3              | corneal edema              | 5/2021            | 5/2021          | possibly related       | mild            | resolved       | concomitant medication              |
|                | conjunctival injection     | 5/2021            | 5/2021          | unlikely to be related | mild            | resolved       | concomitant medication              |
|                | graft rejection            | 8/2021            | 10/2021         | unrelated              | mild            | resolved       | concomitant medication              |
|                | secondary glaucoma         | 7/2021            | 8/2021          | unrelated              | mild            | resolved       | concomitant medication              |
|                | cataract                   | n.a.              | /               | unrelated              | mild            | unresolved     | none                                |

**Table S3. p24 antibody test.**

| <b>Positive Index*</b> | <b>Positive control</b> | <b>Negative control</b> | <b>-1 day</b> | <b>1 month</b> | <b>3 months</b> | <b>6 months</b> |
|------------------------|-------------------------|-------------------------|---------------|----------------|-----------------|-----------------|
| <b>Patient 1</b>       | 15.3                    | 0.49                    | 0.45          | 0.45           | 0.45            | 0.45            |
| <b>Patient 2</b>       | 13.4                    | 0.51                    | 0.50          | 0.44           | 0.46            | 0.44            |
| <b>Patient 3</b>       | 11.62                   | 0.49                    | 0.46          | 0.49           | 0.5             | 0.47            |

\* Calculate the mean absorbance values (OD450) for Negative Control using formula:  
OD mean (negative control) = (OD (negative control 1) + OD (negative control 2)) / 2.  
Calculate the cut-off value: Cut-off = OD mean (negative control) + 0.05  
Calculate Positivity Index for each sample:  
Positivity Index = mean OD 450 (sample) / Cut-off value.  
If Positivity Index value is greater than 1.1, the result is **Positive**.  
If Positivity Index value is less than 0.9, the result is **Negative**.

**Table S4. Sequencing information on raw data.**

| <b>Sample</b> | <b>Yield (Mb)</b> | <b>Depth (x)</b> | <b>Reads</b>  | <b>Base<math>\geq</math>Q30 (%)</b> | <b>Insert size (bp)</b> |
|---------------|-------------------|------------------|---------------|-------------------------------------|-------------------------|
| <b>WT</b>     | 192,354           | 64               | 1,282,361,462 | 91.60%                              | 420.725                 |
| <b>HELP</b>   | 185,126           | 62               | 1,234,177,196 | 90.93%                              | 403.405                 |

Note:

Depth (x): The average sequencing depth (Yield bases/Human genome size).

Yield (Mb): The number of bases in raw data.

Reads: The number of paired-end reads.

Base  $\geq$  Q30 (%): The percentage of bases with a quality score of 30 or higher. Q30 means that the sequencing error rate of a base is 0.001.

Insert size (bp): The average size of sample sequencing fragments.



**Table S5. The coverage statistics of the sequence alignment.**

| Sample | Mapping rate | Properly mapped | Fraction of covered with $\geq 20x$ | Fraction of covered with $\geq 0.2 * \text{Mean}$ | Fraction of CDS regions covered with $\geq 20x$ |
|--------|--------------|-----------------|-------------------------------------|---------------------------------------------------|-------------------------------------------------|
| WT     | 92.254%      | 89.592%         | 97.168%                             | 98.809%                                           | 98.55%                                          |
| HELP   | 92.537%      | 89.771%         | 97.095%                             | 98.831%                                           | 98.50%                                          |

Note:

Mapping rate (%): The percentage of total reads mapping to the reference genome.

Properly mapped: In the paired-end sequencing mode, the percentage of total reads, with both Read1 and Read2 mapping to the genome and corresponding mapping positions consistent with the fragment size distribution of the sequencing library.

Fraction of covered with  $\geq 20x$  (%): It refers to the proportion of bases with a coverage depth not less than 20x in the genome.

Fraction of covered with  $\geq 0.2 * \text{Mean}$  (%): It refers to the proportion of bases with a coverage depth of no less than 0.2 fold the mean depth of coverage in the genome.

Fraction of CDS regions covered with  $\geq 20x$  (%): It refers to the proportion of bases with a coverage depth not less than 20x in the CDS regions.

**Table S6. The information on potential off-target site**

| Pos            | Strand | Sequence               | Variant_Classification | Variant_type | Ref | Alt | DP | DV | AF     | Distance to CDS of gene                       | Distance |
|----------------|--------|------------------------|------------------------|--------------|-----|-----|----|----|--------|-----------------------------------------------|----------|
| chr8:105379575 | +      | GCGAGaGTAAaCaacTCCCAGG | intergenic             | SNP          | G   | T   | 55 | 3  | 0.0545 | -10678bp to gene:DCSTAMP;<br>+12064bp to DPYS | 20       |

Note:

Pos: The mutation site on chromosome.

Strand: The strand where the off-target sites are located.

Sequence: Sequence of off-target sites.

Variant\_Classification: The genome function regions where the mutations occurred.

Variant\_type: Variant type (SNP/Indel). SNP, single nucleotide polymorphism.

Ref: The corresponding base in the reference genome (before editing) at this mutation site.

Alt: The mutated base/sequence.

DP: Sequencing depth of the locus.

DV: Sequencing depth of the mutation base.

AF: Proportion of reads carrying variant alleles.

Distance to CDS of gene: The distance between gene and the mutation.

Distance: The distance between the mutation site and the homologous region site, with negative values indicating that the mutation occurred upstream of the homologous site and positive values indicating that the mutation occurred downstream of the homologous site

**Table S7. The statistics table of SV.**

| <b>Group</b>      | <b>BND</b> | <b>DEL</b> | <b>DUP</b> | <b>INS</b> | <b>INV</b> | <b>Total</b> |
|-------------------|------------|------------|------------|------------|------------|--------------|
| <b>HELP_vs_WT</b> | 7          | 2          | 0          | 1          | 0          | 10           |
| <b>WT_vs_HELP</b> | 6          | 1          | 0          | 0          | 0          | 7            |

Note:

- 1) Group: The first line is in the format case\_vs\_control, which is the experiment and control groups provided by the project. The second line is in the format control\_vs\_case. The WT of the project is the untreated HCSCs and HELP-treated HCSCs is the experimental group (case).
- 2) BND: The number of chromosomal translocation breakend variations of samples.
- 3) DEL: The number of large segment deletion variations of samples.
- 4) DUP: The number of tandem duplication variations of samples.
- 5) INS: The number of chromosome segment insertion variations of samples.
- 6) INV: The number of chromosome segment inversion variations of samples.
- 7) Total: Total number of structural variations detected of samples.

**Table S8. SV annotation of sample group HELP\_vs\_WT.**

| Chrom | POS               | FOR<br>MAT | WT            | HELP          | Somatic<br>Score | SV<br>type | Cyto<br>Band | Gene_<br>name         | Gene<br>count | Function_<br>Gene | RE_gene                                                                                      | ExAC<br>_delZ     | ExAC<br>_dupZ     | O<br>MI<br>M_<br>ID | Gno<br>mAD<br>_pLI | ExAC<br>_pLI  | ACMG_<br>class |
|-------|-------------------|------------|---------------|---------------|------------------|------------|--------------|-----------------------|---------------|-------------------|----------------------------------------------------------------------------------------------|-------------------|-------------------|---------------------|--------------------|---------------|----------------|
| chr3  | 6059<br>8188      | PR:SR      | 46,0:<br>44,0 | 28,2:4<br>0,3 | 41               | DEL        | p14.2        | FHIT;<br>MIR54<br>8BB | 2             | Intron<br>/exonic | AAGAB<br>(HI=3/morb<br>id/RE=mTL<br>_miRNA);A<br>BHD5<br>(morbid/RE<br>=mTL_miR<br>NA);..... | 0.4458<br>9193    | -<br>0.5564<br>19 | .                   | 0.005<br>7055      | 0.0013<br>918 | 3              |
| chr8  | 4866<br>2203      | PR:SR      | 15,0:<br>46,5 | 31,6          | 40               | DEL        | q11.21       | .                     | 0             | intergenic        | .                                                                                            | .                 | .                 | .                   | .                  | .             | 3              |
| chr11 | 1628<br>828       | PR         | 75,0          | 31,6          | 64               | BND        | p15.5        | KRTA<br>P5-3          | 1             | exonic            | .                                                                                            | .                 | .                 | .                   | 0.164<br>38        | 0.2629<br>1   | .              |
| chr11 | 5032<br>5994      | PR         | 62,0          | 24,0:4<br>3,8 | 60               | BND        | p11.12       | .                     | 0             | intergenic        | .                                                                                            | .                 | .                 | .                   | .                  | .             | .              |
| chr11 | 7123<br>8526      | PR         | 75,0          | 74,8          | 48               | BND        | q13.4        | KRTA<br>P5-7          | 1             | exonic            | .                                                                                            | .                 | .                 | .                   | 0.090<br>951       | 0.5819<br>6   | .              |
| chr16 | 2103<br>1742      | PR:SR      | 2,0:1<br>8,0  | 51,7          | 38               | INS        | p12.3        | DNAH<br>3             | 1             | intron            | .                                                                                            | -<br>2.2534<br>79 | 0.8406<br>6663    | .                   | 1.54<br>E-64       | 9.63E-<br>51  | .              |
| chr16 | 3515<br>7286      | PR         | 62,0          | 74,8          | 49               | BND        | p11.1        | .                     | 0             | intergenic        | .                                                                                            | .                 | .                 | .                   | .                  | .             | .              |
| chr4  | 1875<br>0332<br>4 | PR         | 45,0          | 4,0:12,<br>7  | 44               | BND        | q35.2        | .                     | 0             | intergenic        | .                                                                                            | .                 | .                 | .                   | .                  | .             | .              |
| chr4  | 1901<br>1038<br>8 | PR         | 45,0          | 51,7          | 44               | BND        | q35.2        | .                     | 0             | intergenic        | .                                                                                            | .                 | .                 | .                   | .                  | .             | .              |
| chrY  | 9986<br>510       | PR         | 231,1         | 199,7         | 33               | BND        | p11.2        | .                     | 0             | intergenic        | .                                                                                            | .                 | .                 | .                   | .                  | .             | .              |

Note:

Chrom: Name of the chromosome.

POS: The starting site of chromosome of structural variation.

FORMAT: The FORMAT column from a VCF file. PR indicates spanning paired-read support for the ref and alt alleles in the order listed. SR indicates split reads for the ref and alt alleles in the order listed

WT: The support reads of control sample which is shown in the format indicated by column "Format"

HELP: The support reads of case sample which is shown in the format indicated by column "Format".

SomaticScore: Somatic variant quality score.

SV\_type: Types of structural variation.

CytoBand: Cytogenic band annotation.

Gene\_name: Gene symbol.

Gene\_count: Number of overlapped genes with the copy number variation segment.

Function\_Gene: The gene function regions where the variant occurred.

RE\_gene: Name of the genes regulated by a regulatory element overlapped with the SV to annotate.

ExAC\_delZ: Positive delZ\_ExAC (Z score) from ExAC indicate gene intolerance to deletion.

ExAC\_dupZ: Positive dupZ\_ExAC (Z score) from ExAC indicate gene intolerance to duplication.

OMIM\_ID: OMIM unique six-digit identifier.

GnomAD\_pLI: Score computed by gnomAD indicating the probability that a gene is intolerant to a loss of function variation.

ExAC\_pLI: Score computed by ExAC indicating the probability that a gene is intolerant to a loss of function variation. ExAC considers pLI  $\geq$  0.9 as an extremely LoF intolerant gene.

ACMG\_class: SV ranking class into 1 of 5: class 1 (benign) class 2 (likely benign) class 3 (variant of uncertain significance) class 4 (likely pathogenic) class 5 (pathogenic).

**Table S9. SV annotation of sample group WT\_vs\_HELP.**

| Chrom | POS           | FOR<br>MAT | HELP          | WT            | Somati<br>cScore | SV_<br>type | Cyto<br>Band | Gene_<br>name | Gene_<br>count | Function_<br>Gene | RE_<br>gene | ExAC<br>delZ   | ExAC<br>dupZ       | OMI<br>M_ID | GnomAD<br>pLI  | ExAC<br>pLI  | ACMG_<br>class |
|-------|---------------|------------|---------------|---------------|------------------|-------------|--------------|---------------|----------------|-------------------|-------------|----------------|--------------------|-------------|----------------|--------------|----------------|
| chr5  | 149029<br>138 | PR:SR      | 13,0:1<br>0,0 | 16,0:<br>8,5  | 30               | DEL         | q32          | .             | 0              | intergenic        | .           | .              | .                  | .           | .              | .            | 3              |
| chr10 | 245005<br>27  | PR:SR      | 29,0:1<br>8,1 | 28,0:<br>15,6 | 47               | BND         | p12.2        | KIAA1<br>217  | 1              | intron            | .           | 1.1721<br>6141 | 0.5818<br>1469     | .           | 0.0002318<br>5 | 0.0141<br>68 | .              |
| chr10 | 589393<br>51  | PR         | 80,1          | 61,9          | 30               | BND         | q21.1        | .             | 0              | intergenic        | .           | .              | .                  | .           | .              | .            | .              |
| chr15 | 478721<br>83  | PR:SR      | 47,0:6<br>3,0 | 48,2:<br>54,2 | 34               | BND         | q21.1        | SEMA<br>6D    | 1              | intron            | .           | 0.5020<br>9124 | -<br>0.2822<br>914 | .           | 0.93948        | 0.9994<br>7  | 3              |
| chr3  | 504788<br>44  | PR:SR      | 47,0:6<br>3,0 | 48,2:<br>54,2 | 34               | BND         | p21.31       | CACN<br>A2D2  | 1              | intron            | .           | 1.6857<br>4942 | 1.5114<br>1627     | 607082      | 0.99997        | 0.9996<br>9  | 3              |
| chr5  | 841599<br>32  | PR:SR      | 29,0:1<br>8,1 | 28,0:<br>15,6 | 47               | BND         | q14.3        | .             | 0              | intergenic        | .           | .              | .                  | .           | .              | .            | .              |
| chr9  | 123131<br>688 | PR         | 80,1          | 61,9          | 30               | BND         | q33.2        | .             | 0              | intergenic        | .           | .              | .                  | .           | .              | .            | .              |

**Table S10. The primers for UL8 and UL29 amplification.**

| Target sites | gRNA Sequence (5'-3') | Primer names | Sequence (5'-3')      |
|--------------|-----------------------|--------------|-----------------------|
| UL8          | GGGGCAGCCATACCGGTAA   | Y1-F         | gagccgtagaatcccgcag   |
|              |                       | Y2-R         | aaacctaccaaacagaaa    |
| UL29         | GCGAGCGTACACGTATCCC   | Y3-F         | gggtgtagtccgaaaagccaa |
|              |                       | Y4-R         | cacgccccaggtaaagtga   |

**Table S11. The quality report of HELP.**

|                       |                                        |                      |              |
|-----------------------|----------------------------------------|----------------------|--------------|
| <b>Source</b>         | OBiO Technology (Shanghai) Corp., Ltd. | <b>Specification</b> | 0.25 ml/vial |
| <b>Test Category</b>  | <b>Test</b>                            | <b>Result</b>        |              |
| <b>Quantification</b> | p24 protein content                    | 1.19E+04 ng p24/ml   |              |
| <b>Safety</b>         | Bacteria                               | Negative             |              |
|                       | Mycoplasma                             | Negative             |              |
| <b>Conclusion</b>     | Qualified                              |                      |              |



**Table S12. Intraocular bacterial and fungal culture results of patient 2.** Gram+ cocci were found in the right eye of patient 2 during the vitrectomy 6 months after PK.

| <b>Culture</b>  | <b>Presence</b> | <b>Species</b>      |
|-----------------|-----------------|---------------------|
| <b>Bacteria</b> | +               | Gram-positive cocci |
| <b>Fungus</b>   | -               | -                   |

**Table S13. Blood tests of patient 1.** The blood tests of patient 1 showed slight anemia, hypoproteinemia, and diabetes before the injection. We observed no abnormal changes which were related to the injection in these blood tests at 12-month follow-up.

| Code                                                              | Pre-Injection |   | Twelve Months Post-Injection |   | Normal Range | Unit                |
|-------------------------------------------------------------------|---------------|---|------------------------------|---|--------------|---------------------|
| White blood cell count                                            | 5.24          |   | 4.39                         |   | 4.0~10.0     | 10 <sup>9</sup> /L  |
| Red blood cell count                                              | 2.71          | ↓ | 3.47                         | ↓ | 4.3~5.8      | 10 <sup>12</sup> /L |
| Hemoglobin                                                        | 106           | ↓ | 122                          | ↓ | 130~175      | g/l                 |
| Packed red blood cell volume                                      | 30.7          | ↓ | 36.9                         | ↓ | 40~50        | %                   |
| Red blood cell volume distribution width-coefficient of variation | 15.1          | ↑ | 15.2                         | ↑ | 10.0~15.0    | %                   |
| Red blood cell volume distribution width-standard deviation       | 62.3          | ↑ | 59.8                         | ↑ | 35.0~50.0    | fL                  |
| Mean corpuscular volume                                           | 113.3         | ↑ | 106.3                        | ↑ | 80.0~100.0   | fL                  |
| Mean corpuscular hemoglobin                                       | 39.1          | ↑ | 35.2                         | ↑ | 27.0~33.0    | Pg                  |
| Mean corpuscular hemoglobin concentration                         | 345           |   | 331                          |   | 320~360      | g/l                 |
| Platelet count                                                    | 175           |   | 213                          |   | 100~400      | 10 <sup>9</sup> /L  |
| Platelet distribution width                                       | 9.7           |   | 11.1                         |   | 9.0~17.00    |                     |
| Thrombocytocrit                                                   | 0.17          |   | 0.22                         |   | 0.16~0.22    | %                   |
| Mean platelet volume                                              | 9.7           |   | 10.2                         |   | 9.0~16.0     | fL                  |
| Platelet-larger cell ratio                                        | 21.6          |   | 25.0                         |   | 14.0~46.0    | %                   |
| Percentage of neutrophil                                          | 61.6          |   | 56.2                         |   | 50.0~70.0    | %                   |
| Percentage of lymphocyte                                          | 32.1          |   | 30.8                         |   | 20.0~40.0    | %                   |
| Percentage of eosinophil                                          | 1.5           |   | 3.0                          |   | 0.5~5.0      | %                   |
| Percentage of monocyte                                            | 4.4           |   | 8.9                          | ↑ | 3.0~8.0      | %                   |
| Percentage of basophil                                            | 0.4           |   | 1.1                          | ↑ | 0.0~1.0      | %                   |
| Neutrophil count                                                  | 3.23          |   | 2.47                         |   | 2.0~7.0      | 10 <sup>9</sup> /L  |
| Lymphocyte count                                                  | 1.68          |   | 1.35                         |   | 0.8~4.0      | 10 <sup>9</sup> /L  |
| Monocyte count                                                    | 0.23          |   | 0.39                         |   | 0.10~0.80    | 10 <sup>9</sup> /L  |
| Eosinophil count                                                  | 0.08          |   | 0.13                         |   | 0.00~0.50    | 10 <sup>9</sup> /L  |
| Basophil count                                                    | 0.02          |   | 0.05                         |   | 0.00~0.10    | 10 <sup>9</sup> /L  |
| Code                                                              | Pre-Injection |   | Twelve Months Post-Injection |   | Normal Range | Unit                |
| Alanine aminotransferase                                          | 22            |   | 31                           |   | 0~65         | u/l                 |
| Aspartate aminotransferase                                        | 25            |   | 30                           |   | 15~37        | u/l                 |
| Total protein                                                     | 67            |   | 71                           |   | 64~82        | g/l                 |
| Albumin                                                           | 47            |   | 43                           |   | 35~54        | g/l                 |
| Globulin                                                          | 20            |   | 28                           |   | 20~40        | g/l                 |
| Albumin/globulin                                                  | 2.4           |   | 1.5                          |   | 1.2~2.5      |                     |

|                                              |                      |   |                                     |   |                     |             |
|----------------------------------------------|----------------------|---|-------------------------------------|---|---------------------|-------------|
| <b>γ-Glutamyltransferase</b>                 | 55                   |   | 37                                  |   | 15~85               | u/l         |
| <b>Prealbumin</b>                            | 150                  | ↓ | 200                                 |   | 200~400             | mg/l        |
| <b>Alkaline phosphatase</b>                  | 134                  |   | 137                                 | ↑ | 50~136              | u/l         |
| <b>Blood urea nitrogen</b>                   | 6.8                  | ↑ | 9.2                                 | ↑ | 2.5~6.4             | mmol/l      |
| <b>Creatinine</b>                            | 78                   |   | 90                                  |   | 53~115              | umol/l      |
| <b>Uric acid</b>                             | 0.42                 | ↑ | 0.38                                | ↑ | 0.202~0.417         | mmol/l      |
| <b>Total bilirubin</b>                       | 10                   |   | 6                                   |   | 0~17                | umol/l      |
| <b>Connect bilirubin</b>                     | 5                    |   | 2                                   |   | 1~5                 | umol/l      |
| <b>Total bile acid</b>                       | 14.5                 | ↑ | 14.4                                | ↑ | 0.0~10.0            | umol/l      |
| <b>High density lipoprotein</b>              | 1.73                 |   | 1.86                                |   | 0.910~2.060         | mmol/l      |
| <b>Low density lipoprotein</b>               | 1.33                 |   | 2.21                                |   | 0.00~3.36           | mmol/l      |
| <b>Apoprotein A</b>                          | 1.53                 |   | 1.28                                |   | 1.100~1.700         | g/l         |
| <b>Apoprotein B</b>                          | 0.56                 | ↓ | 0.76                                | ↓ | 0.800~1.550         | g/l         |
| <b>Apoprotein E</b>                          | 35                   |   | 38                                  |   | 27~45               | mg/l        |
| <b>Lipoprotein small a</b>                   | 25                   |   | 42                                  |   | 0~300               | mg/l        |
| <b>Small dense low density lipoprotein</b>   | 0.74                 |   | 1.20                                |   | 0.26~1.36           | mmol/l      |
| <b>Calcium</b>                               | 2.21                 |   | 2.21                                |   | 2.04~2.74           | mmol/l      |
| <b>Phosphorus</b>                            | 1.24                 |   | 1.15                                |   | 0.80~1.60           | mmol/l      |
| <b>Potassium</b>                             | 4.6                  |   | 4.8                                 |   | 3.5~5.4             | mmol/l      |
| <b>Sodium</b>                                | 145                  |   | 143                                 |   | 135~147             | mmol/l      |
| <b>Chloride</b>                              | 109                  | ↑ | 103                                 |   | 96~108              | mmol/l      |
| <b>Carbon dioxide binding capacity</b>       | 22                   |   | 24                                  |   | 21~32               | mmol/l      |
| <b>Lactate dehydrogenase</b>                 | 172                  |   | 153                                 |   | 81~234              | u/l         |
| <b>Creatine kinase</b>                       | 75                   |   | 95                                  |   | 39~308              | u/l         |
| <b>Complement 3c</b>                         | 0.73                 | ↓ | 0.71                                | ↓ | 0.9~1.8             | g/l         |
| <b>Complement 4</b>                          | 0.20                 |   | 0.16                                |   | 0.1~0.4             | g/l         |
| <b>Complement 1q</b>                         | 108.7                | ↓ | 117.7                               | ↓ | 159~233             | mg/l        |
| <b>Total complement</b>                      | 68.7                 | ↑ | 62.7                                | ↑ | 32.5~58.3           | u/ml        |
| <b>Haptoglobin</b>                           | 56.50                |   | 92.00                               |   | 32~205              | mg/dl       |
| <b>Blood glucose</b>                         | 6.1                  |   | 6.9                                 | ↑ | 3.9~6.1             | mmol/l      |
| <b>Total cholesterol</b>                     | 3.04                 |   | 4.54                                |   | 2.80~5.20           | mmol/l      |
| <b>Triacylglycerol</b>                       | 0.77                 |   | 0.70                                |   | 0.34~2.26           | mmol/l      |
| <b>Code</b>                                  | <b>Pre-Injection</b> |   | <b>Twelve Months Post-Injection</b> |   | <b>Normal Range</b> | <b>Unit</b> |
| <b>Prothrombin time</b>                      | 13.7                 |   | 12.7                                |   | 11.0~14.5           | sec         |
| <b>International normalized ratio</b>        | 1.03                 |   | 0.98                                |   | 0.80~1.20           | INR         |
| <b>Activated partial thromboplastin time</b> | 35.9                 |   | 32.6                                |   | 28~45               | s           |
| <b>Thrombin time</b>                         | 16.3                 |   | 17.2                                |   | 14.0~21.0           | s           |

|                               |                      |   |                                     |   |                     |             |
|-------------------------------|----------------------|---|-------------------------------------|---|---------------------|-------------|
| <b>Fibrinogen</b>             | 2.70                 |   | 3.01                                |   | 2.00~4.00           | g/l         |
| <b>D-Dimer</b>                | 0.67                 | ↑ | 0.75                                | ↑ | 0.00~0.50           | ug/ml       |
| <b>Prothrombin time ratio</b> | 95                   |   | 105                                 |   | 70~150              | %           |
| <b>Code</b>                   | <b>Pre-Injection</b> |   | <b>Twelve Months Post-Injection</b> |   | <b>Normal Range</b> | <b>Unit</b> |
| <b>Glycated hemoglobin</b>    | 6.2                  | ↑ | 6.2                                 | ↑ | 4.0~6.0             | %           |

\*Red font denotes an elevated clinical index than the normal range; pink font denotes a decreased clinical index than the normal range. Similarly hereinafter.

**Table S14. Urine tests of patient 1.** The pre-injection and twelve months post-injection routine urinalysis of patient 1 was unremarkable.

| Code                          | Pre-Injection | Twelve Months Post-Injection | Normal Range | Unit   |
|-------------------------------|---------------|------------------------------|--------------|--------|
| Urine glucose                 | -             | -                            | -            |        |
| Ketone body                   | -             | -                            | -            |        |
| Occult blood                  | -             | -                            | -            |        |
| Protein                       | -             | -                            | -            |        |
| Nitrite                       | -             | -                            | -            |        |
| Bilirubin                     | -             | -                            | -            |        |
| Specific gravity              | >=1.030 ↑     | 1.020                        | 1.003~1.030  |        |
| Urine PH value                | 6.0           | 6.0                          | 5.0~6.5      |        |
| Urobilinogen                  | 16            | 16                           | 3.0~16.0     | umol/l |
| Leukocyte                     | -             | -                            | -            |        |
| White blood cell count        | 2             | 2                            | 0~28         | /ul    |
| Red blood cell count          | 1             | 6                            | 0~17         | /ul    |
| Squamous epithelial cells     | -             | 2                            | 0~28         | /ul    |
| Non-squamous epithelial cells | -             | 1                            | 0~6          | /ul    |
| Trichomonas                   | -             | -                            | 0~1          | /ul    |
| Kidney epithelial cells       | -             | -                            | 0~6          | /ul    |
| Transparent tube              | -             | -                            | 0~2          | /ul    |
| Particle tube                 | -             | -                            | 0~1          | /LPF   |
| Cell tube                     | -             | -                            | 0~1          | /LPF   |
| Triphosphate crystal          | -             | -                            |              |        |
| Calcium oxalate crystal       | -             | -                            |              |        |
| Leucine crystal               | -             | -                            |              |        |
| Cystine crystals              | -             | -                            |              |        |

**Table S15. Infectious diseases tests of patient 1.** The four transfusion-associated contagion tests (hepatitis B, hepatitis C, syphilis, AIDS) of patient 1 were unremarkable.

| <b>Code</b>                                           | <b>Pre-Injection</b> | <b>Twelve Months Post-Injection</b> |
|-------------------------------------------------------|----------------------|-------------------------------------|
| <b>Hepatitis B virus surface antigen</b>              | Negative             | Negative                            |
| <b>Hepatitis B virus surface antibody</b>             | Negative             | Negative                            |
| <b>Hepatitis B virus e antigen</b>                    | Negative             | Negative                            |
| <b>Hepatitis B virus e antibody</b>                   | Negative             | Negative                            |
| <b>Hepatitis B virus core antibody</b>                | Negative             | Negative                            |
| <b>Hepatitis B virus antibody-immunoglobulin M</b>    | Negative             | Negative                            |
| <b>Hepatitis B virus pre-S1 antigen</b>               | Negative             | Negative                            |
| <b>Hepatitis C virus antibody</b>                     | Negative             | Negative                            |
| <b>Treponema pallidum particle agglutination test</b> | Negative             | Negative                            |
| <b>Rapid plasma regain test</b>                       | Negative             | Negative                            |
| <b>Human immunodeficiency virus antibody</b>          | Negative             | Negative                            |

**Table S16. Blood tests of patient 2.** The blood tests of patient 2 indicated mild hyperlipidemia, which had no obvious influence on the implementation of the surgery. We observed no notable changes related to the injection in these blood tests at 12-month follow-up.

| Code                                                              | Pre-Injection | Twelve Months Post-Injection | Normal Range | Unit                |
|-------------------------------------------------------------------|---------------|------------------------------|--------------|---------------------|
| White blood cell count                                            | 7.17          | 10.16 ↑                      | 4.0~10.0     | 10 <sup>9</sup> /L  |
| Red blood cell count                                              | 4.73          | 4.69                         | 4.3~5.8      | 10 <sup>12</sup> /L |
| Hemoglobin                                                        | 148           | 144                          | 130~175      | g/l                 |
| Packed red blood cell volume                                      | 44.0          | 43.1                         | 40~50        | %                   |
| Red blood cell volume distribution width-coefficient of variation | 12.1          | 12.9                         | 10.0~15.0    | %                   |
| Red blood cell volume distribution width-standard deviation       | 41.6          | 43.1                         | 35.0~50.0    | fL                  |
| Mean corpuscular volume                                           | 93.0          | 91.9                         | 80.0~100.0   | fL                  |
| Mean corpuscular hemoglobin                                       | 31.3          | 30.7                         | 27.0~33.0    | Pg                  |
| Mean corpuscular hemoglobin concentration                         | 336           | 334                          | 320~360      | g/l                 |
| Platelet count                                                    | 229           | 236                          | 100~400      | 10 <sup>9</sup> /L  |
| Platelet distribution width                                       | 9.3           | 9.8                          | 9.0~17.00    |                     |
| Thrombocytocrit                                                   | 0.21          | 0.22                         | 0.16~0.22    | %                   |
| Mean platelet volume                                              | 9.1           | 9.2                          | 9.0~16.0     | fL                  |
| Platelet-larger cell ratio                                        | 17.7          | 18.4                         | 14.0~46.0    | %                   |
| Percentage of neutrophil                                          | 64.3          | 77.8 ↑                       | 50.0~70.0    | %                   |
| Percentage of lymphocyte                                          | 28.7          | 18.3 ↓                       | 20.0~40.0    | %                   |
| Percentage of eosinophil                                          | 1.0           | 0.3 ↓                        | 0.5~5.0      | %                   |
| Percentage of monocyte                                            | 5.6           | 3.1                          | 3.0~8.0      | %                   |
| Percentage of basophil                                            | 0.4           | 0.5                          | 0.0~1.0      | %                   |
| Neutrophil count                                                  | 4.61          | 7.9 ↑                        | 2.0~7.0      | 10 <sup>9</sup> /L  |
| Lymphocyte count                                                  | 2.06          | 1.86                         | 0.8~4.0      | 10 <sup>9</sup> /L  |
| Monocyte count                                                    | 0.40          | 0.32                         | 0.10~0.80    | 10 <sup>9</sup> /L  |
| Eosinophil count                                                  | 0.07          | 0.03                         | 0.00~0.50    | 10 <sup>9</sup> /L  |
| Basophil count                                                    | 0.03          | 0.05                         | 0.00~0.10    | 10 <sup>9</sup> /L  |
| Code                                                              | Pre-Injection | Twelve Months Post-Injection | Normal Range | Unit                |
| Alanine aminotransferase                                          | 17            | 19                           | 0~65         | u/l                 |
| Aspartate aminotransferase                                        | 17            | 15                           | 15~37        | u/l                 |
| Total protein                                                     | 70            | 68                           | 64~82        | g/l                 |
| Albumin                                                           | 46            | 42                           | 35~54        | g/l                 |
| Globulin                                                          | 24            | 26                           | 20~40        | g/l                 |
| Albumin/globulin                                                  | 1.9           | 1.6                          | 1.2~2.5      |                     |

|                                              |       |                      |        |                                     |                     |             |
|----------------------------------------------|-------|----------------------|--------|-------------------------------------|---------------------|-------------|
| <b>γ-Glutamyltransferase</b>                 | 33    |                      | 37     |                                     | 15~85               | u/l         |
| <b>Prealbumin</b>                            | 320   |                      | 350    |                                     | 200~400             | mg/l        |
| <b>Alkaline phosphatase</b>                  | 71    |                      | 80     |                                     | 50~136              | u/l         |
| <b>Blood urea nitrogen</b>                   | 5.5   |                      | 7.5    | ↑                                   | 2.5~6.4             | mmol/l      |
| <b>Creatinine</b>                            | 69    |                      | 62     |                                     | 53~115              | umol/l      |
| <b>Uric acid</b>                             | 0.25  |                      | 0.32   |                                     | 0.202~0.417         | mmol/l      |
| <b>Total bilirubin</b>                       | 16    |                      | 10     |                                     | 0~17                | umol/l      |
| <b>Connect bilirubin</b>                     | 5     |                      | 2      |                                     | 1~5                 | umol/l      |
| <b>Total bile acid</b>                       | 2.5   |                      | 11.2   | ↑                                   | 0.0~10.0            | umol/l      |
| <b>High density lipoprotein</b>              | 1.24  |                      | 1.61   |                                     | 0.910~2.060         | mmol/l      |
| <b>Low density lipoprotein</b>               | 4.36  | ↑                    | 4.72   | ↑                                   | 0.00~3.36           | mmol/l      |
| <b>Apoprotein A</b>                          | 1.46  |                      | 1.24   |                                     | 1.100~1.700         | g/l         |
| <b>Apoprotein B</b>                          | 1.51  |                      | 1.55   |                                     | 0.800~1.550         | g/l         |
| <b>Apoprotein E</b>                          | 52    | ↑                    | 46     | ↑                                   | 27~45               | mg/l        |
| <b>Lipoprotein small a</b>                   | 41    |                      | 47     |                                     | 0~75                | nmol/l      |
| <b>Small dense low density lipoprotein</b>   | 3.11  | ↑                    | 2.70   | ↑                                   | 0.26~1.36           | mmol/l      |
| <b>Calcium</b>                               | 2.34  |                      | 2.25   |                                     | 2.04~2.74           | mmol/l      |
| <b>Phosphorus</b>                            | 1.18  |                      | 0.99   |                                     | 0.80~1.60           | mmol/l      |
| <b>Potassium</b>                             | 4.2   |                      | 4.0    |                                     | 3.5~5.4             | mmol/l      |
| <b>Sodium</b>                                | 140   |                      | 142    |                                     | 135~147             | mmol/l      |
| <b>Chloride</b>                              | 104   |                      | 101    |                                     | 96~108              | mmol/l      |
| <b>Carbon dioxide binding capacity</b>       | 23    |                      | 21     |                                     | 21~32               | mmol/l      |
| <b>Lactate dehydrogenase</b>                 | 168   |                      | 182    |                                     | 81~234              | u/l         |
| <b>Creatine kinase</b>                       | 122   |                      | 128    |                                     | 39~308              | u/l         |
| <b>Complement 3c</b>                         | 1.03  |                      | 1.04   |                                     | 0.9~1.8             | g/l         |
| <b>Complement 4</b>                          | 0.20  |                      | 0.32   |                                     | 0.1~0.4             | g/l         |
| <b>Complement 1q</b>                         | 154.5 | ↓                    | 169.4  |                                     | 159~233             | mg/l        |
| <b>Total complement</b>                      | 67.9  | ↑                    | 63.5   | ↑                                   | 32.5~58.3           | u/ml        |
| <b>Haptoglobin</b>                           | 93.30 |                      | 110.50 |                                     | 32~205              | mg/dl       |
| <b>Blood glucose</b>                         | 5.6   |                      | 6.1    |                                     | 3.9~6.1             | mmol/l      |
| <b>Total cholesterol</b>                     | 6.12  | ↑                    | 7.04   | ↑                                   | 2.80~5.20           | mmol/l      |
| <b>Triacylglycerol</b>                       | 2.33  | ↑                    | 1.81   |                                     | 0.34~2.26           | mmol/l      |
| <b>Code</b>                                  |       | <b>Pre-Injection</b> |        | <b>Twelve Months Post-Injection</b> | <b>Normal Range</b> | <b>Unit</b> |
| <b>Prothrombin time</b>                      | 13.3  |                      | 12.4   |                                     | 11.0~14.5           | sec         |
| <b>International normalized ratio</b>        | 0.99  |                      | 0.95   |                                     | 0.80~1.20           | INR         |
| <b>Activated partial thromboplastin time</b> | 35.3  |                      | 33.0   |                                     | 28~45               | s           |
| <b>Thrombin time</b>                         | 18.7  |                      | 19.7   |                                     | 14.0~21.0           | s           |



|                               |                      |                                     |                     |             |
|-------------------------------|----------------------|-------------------------------------|---------------------|-------------|
| <b>Fibrinogen</b>             | 2.98                 | 2.74                                | 2.00~4.00           | g/l         |
| <b>D-Dimer</b>                | 0.24                 | 0.23                                | 0.00~0.50           | ug/ml       |
| <b>Prothrombin time ratio</b> | 102                  | 110                                 | 70~150              | %           |
| <b>Code</b>                   | <b>Pre-Injection</b> | <b>Twelve Months Post-Injection</b> | <b>Normal Range</b> | <b>Unit</b> |
| <b>Glycated hemoglobin</b>    | 5.9                  | 5.9                                 | 4.0~6.0             | %           |

**Table S17. Routine urine test of patient 2.** The routine urinalysis of patient 2 was unremarkable.

| Code                          | Pre-Injection | Twelve Months Post-Injection | Normal Range | Unit   |
|-------------------------------|---------------|------------------------------|--------------|--------|
| Urine glucose                 | -             | -                            | -            |        |
| Ketone body                   | -             | -                            | -            |        |
| Occult blood                  | -             | -                            | -            |        |
| Protein                       | -             | -                            | -            |        |
| Nitrite                       | -             | -                            | -            |        |
| Bilirubin                     | -             | -                            | -            |        |
| Specific gravity              | >=1.030 ↑     | 1.025                        | 1.003~1.030  |        |
| Urine PH value                | 5.5           | 6.0                          | 5.0~6.5      |        |
| Urobilinogen                  | 3.2           | 16                           | 3.0~16.0     | umol/l |
| Leukocyte                     | -             | -                            | -            |        |
| White blood cell count        | 6             | 6                            | 0~28         | /ul    |
| Red blood cell count          | 2             | 2                            | 0~17         | /ul    |
| Squamous epithelial cells     | 2             | 1                            | 0~28         | /ul    |
| Non-squamous epithelial cells | -             | 1                            | 0~6          | /ul    |
| Trichomonas                   | -             | -                            | 0~1          | /ul    |
| Kidney epithelial cells       | -             | -                            | 0~6          | /ul    |
| Transparent tube              | -             | -                            | 0~2          | /ul    |
| Particle tube                 | -             | -                            | 0~1          | /LPF   |
| Cell tube                     | -             | -                            | 0~1          | /LPF   |
| Triphosphate crystal          | -             | -                            |              |        |
| Calcium oxalate crystal       | -             | -                            |              |        |
| Leucine crystal               | -             | -                            |              |        |
| Cystine crystals              | -             | -                            |              |        |

**Table S18. Transfusion-associated contagion tests of patient 2.** The contagion tests of patient 2 showed specific antibodies to the hepatitis B virus. The other three transfusion-associated contagion tests (hepatitis C, syphilis, AIDS) were negative.

| <b>Code</b>                                           | <b>Pre-Injection</b> | <b>Twelve Months Post-Injection</b> |
|-------------------------------------------------------|----------------------|-------------------------------------|
| <b>Hepatitis B virus surface antigen</b>              | Negative             | Negative                            |
| <b>Hepatitis B virus surface antibody</b>             | <b>Weak Positive</b> | <b>Weak Positive</b>                |
| <b>Hepatitis B virus e antigen</b>                    | Negative             | Negative                            |
| <b>Hepatitis B virus e antibody</b>                   | Negative             | Negative                            |
| <b>Hepatitis B virus core antibody</b>                | <b>Positive</b>      | <b>Positive</b>                     |
| <b>Hepatitis B virus antibody-immunoglobulin M</b>    | Negative             | Negative                            |
| <b>Hepatitis B virus pre-S1 antigen</b>               | Negative             | Negative                            |
| <b>Hepatitis C virus antibody</b>                     | Negative             | Negative                            |
| <b>Treponema pallidum particle agglutination test</b> | Negative             | Negative                            |
| <b>Rapid plasma regain test</b>                       | Negative             | Negative                            |
| <b>Human immunodeficiency virus antibody</b>          | Negative             | Negative                            |

**Table S19. Blood tests of patient 3.** The blood tests of patient 3 indicated mild hyperlipidemia, which had no obvious influence on the implementation of the surgery.

| Code                                                              | Pre-Injection | Six Months Post-Injection | Normal Range | Unit                |
|-------------------------------------------------------------------|---------------|---------------------------|--------------|---------------------|
| White blood cell count                                            | 5.45          | 4.83                      | 4.0~10.0     | 10 <sup>9</sup> /L  |
| Red blood cell count                                              | 5.28          | 4.89                      | 4.3~5.8      | 10 <sup>12</sup> /L |
| Hemoglobin                                                        | 159           | 152                       | 130~175      | g/l                 |
| Packed red blood cell volume                                      | 46.1          | 42.8                      | 40~50        | %                   |
| Red blood cell volume distribution width-coefficient of variation | 11.9          | 12.4                      | 10.0~15.0    | %                   |
| Red blood cell volume distribution width-standard deviation       | 37.6          | 39.0                      | 35.0~50.0    | fL                  |
| Mean corpuscular volume                                           | 87.3          | 87.5                      | 80.0~100.0   | fL                  |
| Mean corpuscular hemoglobin                                       | 30.1          | 31.1                      | 27.0~33.0    | Pg                  |
| Mean corpuscular hemoglobin concentration                         | 345           | 355                       | 320~360      | g/l                 |
| Platelet count                                                    | 151           | 105                       | 100~400      | 10 <sup>9</sup> /L  |
| Platelet distribution width                                       | 10.8          | 12.2                      | 9.0~17.00    |                     |
| Thrombocytocrit                                                   | 0.14 ↓        | 0.11 ↓                    | 0.16~0.22    | %                   |
| Mean platelet volume                                              | 9.5           | 10.7                      | 9.0~16.0     | fL                  |
| Platelet-larger cell ratio                                        | 21.5          | 30.8                      | 14.0~46.0    | %                   |
| Percentage of neutrophil                                          | 62.3          | 57.7                      | 50.0~70.0    | %                   |
| Percentage of lymphocyte                                          | 29.7          | 32.4                      | 20.0~40.0    | %                   |
| Percentage of eosinophil                                          | 1.7           | 2.3                       | 0.5~5.0      | %                   |
| Percentage of monocyte                                            | 5.9           | 7.3                       | 3.0~8.0      | %                   |
| Percentage of basophil                                            | 0.4           | 0.3                       | 0.0~1.0      | %                   |
| Neutrophil count                                                  | 3.40          | 2.21                      | 2.0~7.0      | 10 <sup>9</sup> /L  |
| Lymphocyte count                                                  | 1.62          | 1.24                      | 0.8~4.0      | 10 <sup>9</sup> /L  |
| Monocyte count                                                    | 0.32          | 0.28                      | 0.10~0.80    | 10 <sup>9</sup> /L  |
| Eosinophil count                                                  | 0.09          | 0.09                      | 0.00~0.50    | 10 <sup>9</sup> /L  |
| Basophil count                                                    | 0.02          | 0.01                      | 0.00~0.10    | 10 <sup>9</sup> /L  |
| Code                                                              | Pre-Injection | Six Months Post-Injection | Normal Range | Unit                |
| Alanine aminotransferase                                          | 29            | 53                        | 0~65         | u/l                 |
| Aspartate aminotransferase                                        | 18            | 26                        | 15~37        | u/l                 |
| Total protein                                                     | 76            | 65                        | 64~82        | g/l                 |
| Albumin                                                           | 49            | 40                        | 35~54        | g/l                 |
| Globulin                                                          | 27            | 24                        | 20~40        | g/l                 |
| Albumin/globulin                                                  | 1.8           | 1.66                      | 1.2~2.5      |                     |
| γ-Glutamyltransferase                                             | 37            | 49                        | 15~85        | u/l                 |

|                                              |       |   |                      |   |                                  |                     |             |
|----------------------------------------------|-------|---|----------------------|---|----------------------------------|---------------------|-------------|
| <b>Prealbumin</b>                            | 350   |   | 310                  |   | 200~400                          | mg/l                |             |
| <b>Alkaline phosphatase</b>                  | 95    |   | 103                  |   | 50~136                           | u/l                 |             |
| <b>Blood urea nitrogen</b>                   | 6.6   | ↑ | 5.6                  |   | 2.5~6.4                          | mmol/l              |             |
| <b>Creatinine</b>                            | 78    |   | 77                   |   | 53~115                           | umol/l              |             |
| <b>Uric acid</b>                             | 0.32  |   | 0.37                 |   | 0.202~0.417                      | mmol/l              |             |
| <b>Total bilirubin</b>                       | 16    |   | 16                   |   | 0~17                             | umol/l              |             |
| <b>Connect bilirubin</b>                     | 7     | ↑ | 3                    |   | 1~5                              | umol/l              |             |
| <b>Total bile acid</b>                       | 6     |   | 2                    |   | 0.0~10.0                         | umol/l              |             |
| <b>High density lipoprotein</b>              | 1.16  |   | 0.84                 | ↓ | 0.910~2.060                      | mmol/l              |             |
| <b>Low density lipoprotein</b>               | 2.79  |   | 2.24                 |   | 0.00~3.36                        | mmol/l              |             |
| <b>Apoprotein A</b>                          | 1.29  |   | 1.00                 | ↓ | 1.100~1.700                      | g/l                 |             |
| <b>Apoprotein B</b>                          | 1.000 |   | 0.800                |   | 0.800~1.550                      | g/l                 |             |
| <b>Apoprotein E</b>                          | 39    |   | 35                   |   | 27~45                            | mg/l                |             |
| <b>Lipoprotein small a</b>                   | 38    |   | 42                   |   | 0~75                             | nmol/l              |             |
| <b>Small dense low density lipoprotein</b>   | 1.90  | ↑ | 1.87                 | ↑ | 0.26~1.36                        | mmol/l              |             |
| <b>Calcium</b>                               | 2.32  |   | 2.32                 |   | 2.04~2.74                        | mmol/l              |             |
| <b>Phosphorus</b>                            | 0.97  |   | 1.23                 |   | 0.80~1.60                        | mmol/l              |             |
| <b>Potassium</b>                             | 4.3   |   | 4.4                  |   | 3.5~5.4                          | mmol/l              |             |
| <b>Sodium</b>                                | 140   |   | 139                  |   | 135~147                          | mmol/l              |             |
| <b>Chloride</b>                              | 102   |   | 105                  |   | 96~108                           | mmol/l              |             |
| <b>Carbon dioxide binding capacity</b>       | 26    |   | 23                   |   | 21~32                            | mmol/l              |             |
| <b>Lactate dehydrogenase</b>                 | 149   |   | 175                  |   | 81~234                           | u/l                 |             |
| <b>Creatine kinase</b>                       | 75    |   | 98                   |   | 39~308                           | u/l                 |             |
| <b>Complement 3c</b>                         | 1.07  |   | 1.12                 |   | 0.9~1.8                          | g/l                 |             |
| <b>Complement 4</b>                          | 0.31  |   | 0.29                 |   | 0.1~0.4                          | g/l                 |             |
| <b>Complement 1q</b>                         | 195.5 |   | 210.4                |   | 159~233                          | mg/l                |             |
| <b>Total complement</b>                      | 82.5  | ↑ | 84.7                 | ↑ | 32.5~58.3                        | u/ml                |             |
| <b>Haptoglobin</b>                           | 86.50 |   | 98.20                |   | 32~205                           | mg/dl               |             |
| <b>Blood glucose</b>                         | 5.7   |   | 4.7                  |   | 3.9~6.1                          | mmol/l              |             |
| <b>Total cholesterol</b>                     | 4.36  |   | 3.68                 |   | 2.80~5.20                        | mmol/l              |             |
| <b>Triacylglycerol</b>                       | 1.23  |   | 2.24                 |   | 0.34~2.26                        | mmol/l              |             |
| <b>Code</b>                                  |       |   | <b>Pre-Injection</b> |   | <b>Six Months Post-Injection</b> | <b>Normal Range</b> | <b>Unit</b> |
| <b>Prothrombin time</b>                      | 13.3  |   | 11.1                 |   | 11.0~14.5                        | sec                 |             |
| <b>International normalized ratio</b>        | 1.00  |   | 0.94                 |   | 0.80~1.20                        | INR                 |             |
| <b>Activated partial thromboplastin time</b> | 37.7  |   | 32.8                 |   | 28~45                            | s                   |             |
| <b>Thrombin time</b>                         | 18.0  |   | 16.8                 |   | 14.0~21.0                        | s                   |             |
| <b>Fibrinogen</b>                            | 3.43  |   | 2.72                 |   | 2.00~4.00                        | g/l                 |             |

|                               |                      |                                  |                     |             |
|-------------------------------|----------------------|----------------------------------|---------------------|-------------|
| <b>D-Dimer</b>                | 0.28                 | 0.31                             | 0.00~0.50           | ug/ml       |
| <b>Prothrombin time ratio</b> | 99                   | 97                               | 70~150              | %           |
| <b>Code</b>                   | <b>Pre-Injection</b> | <b>Six Months Post-Injection</b> | <b>Normal Range</b> | <b>Unit</b> |
| <b>Glycated hemoglobin</b>    | 5.3                  | 4.89                             | 4.0~6.0             | %           |

**Table S20. Routine urine test of patient 3.** The routine urinalysis of patient 3 was unremarkable.

| Code                          | Pre-Injection Results | Normal Range | Unit   |
|-------------------------------|-----------------------|--------------|--------|
| Urine glucose                 | -                     | -            |        |
| Ketone body                   | -                     | -            |        |
| Occult blood                  | -                     | -            |        |
| Protein                       | -                     | -            |        |
| Nitrite                       | -                     | -            |        |
| Bilirubin                     | -                     | -            |        |
| Specific gravity              | >=1.030 ↑             | 1.003~1.030  |        |
| Urine PH value                | 7.0 ↑                 | 5.0~6.5      |        |
| Urobilinogen                  | 3.2                   | 3.0~16.0     | umol/l |
| Leukocyte                     | -                     | -            |        |
| White blood cell count        | 1                     | 0~28         | /ul    |
| Red blood cell count          | 1                     | 0~17         | /ul    |
| Squamous epithelial cells     | -                     | 0~28         | /ul    |
| Non-squamous epithelial cells | -                     | 0~6          | /ul    |
| Trichomonas                   | -                     | 0~1          | /ul    |
| Kidney epithelial cells       | -                     | 0~6          | /ul    |
| Transparent tube              | -                     | 0~2          | /ul    |
| Particle tube                 | -                     | 0~1          | /LPF   |
| Cell tube                     | -                     | 0~1          | /LPF   |
| Triphosphate crystal          | -                     |              |        |
| Calcium oxalate crystal       | -                     |              |        |
| Leucine crystal               | -                     |              |        |
| Cystine crystals              | -                     |              |        |

**Table S21. Transfusion-associated contagion tests of patient 3.** The contagion tests of patient 3 showed specific antibodies to the hepatitis B virus. The other three transfusion-associated contagion tests (hepatitis C, syphilis, AIDS) were negative.

| <b>Code</b>                                           | <b>Pre-Injection Results</b> |
|-------------------------------------------------------|------------------------------|
| <b>Hepatitis B virus surface antigen</b>              | Negative                     |
| <b>Hepatitis B virus surface antibody</b>             | <b>Positive</b>              |
| <b>Hepatitis B virus e antigen</b>                    | Negative                     |
| <b>Hepatitis B virus e antibody</b>                   | <b>Positive</b>              |
| <b>Hepatitis B virus core antibody</b>                | <b>Positive</b>              |
| <b>Hepatitis B virus antibody-immunoglobulin M</b>    | Negative                     |
| <b>Hepatitis B virus pre-S1 antigen</b>               | Negative                     |
| <b>Hepatitis C virus antibody</b>                     | Negative                     |
| <b>Treponema pallidum particle agglutination test</b> | Negative                     |
| <b>Rapid plasma regain test</b>                       | Negative                     |
| <b>Human immunodeficiency virus antibody</b>          | Negative                     |



**Video S1. HELP Administration method.** Each formulation, 0.2 mL in total, was drawn into a 27g ophthalmic syringe for the intrastromal injection. Penetrating keratoplasty was performed following the routine procedures. After sewing up the donor cornea, the graft bed of the recipient was injected with the HELP formulation in 6-8 locations.

## **Supplemental Results of Whole Genome Sequencing (WGS)**

The sequencing depth of sequencing data of the two samples (HELP-treated group and WT group) was sufficient (62x and 64x, respectively) with good sequencing quality (Q30 > 90%) (Table S4). After sequence alignment, the results showed that mapping rate to human genome (hg19) was greater than 92%, and the fraction of covered with  $\geq 20x$  and  $0.2 * \text{Mean}$  were greater than 97%. The fraction of CDS regions covered with  $\geq 20x$  was greater than 98%. These results indicating a good quality of the sequencing data (Table S5).

The analysis of off-target sites showed that there were few potential off-target sites. In the HELP-treated cells, no potential off-target sites of UL8 sgRNA were identified, and one potential off-target site of UL29 sgRNA was identified, which was a SNP located at chr8:105,379,595 in the intergenic region and far from CDS (>10K) with low mutation frequency of 0.0545 (Table S6).

Structural variants (SVs) analysis revealed ten SVs in the HELP-treated HCSCs sample after filtering out the data of untreated HCSCs sample (WT sample), and seven SVs in the WT sample after filtering out the data of HELP-treated HCSCs sample. All the structural variants have low risk of affecting the gene function and causing pathogenicity (Table S7-9). Considering the structural variants result, it is presumed that these SVs probably occur due to the nature of the cells rather than HELP treatment.
